# Supplementary material
Source: Royal Society of Chemistry journal article supplement (doi:10.1039/d6cp00785f)
Supplement: d6cp00785f1.pdf [file d6cp00785f1.pdf]

**Supplementary material for “Rethinking Ytterbium(III)-based Single-Molecule Magnets – Why Trigonal Planar Doesn’t Work!”**

Vinicius Fagundes,<sup>a</sup> Egidio Dias Viegas,<sup>a</sup> and Marcus J. Giansiracusa\*<sup>a</sup>

**Contents:**

|                                                                                   |                |
|-----------------------------------------------------------------------------------|----------------|
| <b>1. Literature SMM data .....</b>                                               | <b>II</b>      |
| <b>2. Idealised Structure calculation for Yb(III) and Er(III) .....</b>           | <b>IV</b>      |
| <b>3. Computational variations.....</b>                                           | <b>XV</b>      |
| <b>4. Model Hamiltonian Simulations .....</b>                                     | <b>XXXVIII</b> |
| <b>5. Comparison of a Real Trigonal Er(III) SMM and its Yb(III) Analogue.....</b> | <b>XLI</b>     |
| <b>6. Predictions of Experimental Targets.....</b>                                | <b>XLII</b>    |

## 1. Literature SMM data

Table S1. Collection of Er zero-field SMMs in literature.

| Er(III) SMMs                                                                     | $U_{\text{eff}}$<br>(K) | Magnetic<br>Field (Oe) | Ref |
|----------------------------------------------------------------------------------|-------------------------|------------------------|-----|
| [Er(dbpc) <sub>3</sub> ]                                                         | 55.7                    | 0                      | 32  |
| [Er(btmsm) <sub>3</sub> ]                                                        | 114.5                   | 0                      | 32  |
| [Er{N(SiMe <sub>3</sub> ) <sub>2</sub> } <sub>3</sub> ]                          | 122                     | 0                      | 33  |
| [Li(THF) <sub>4</sub> ][Er{N(SiMe <sub>3</sub> ) <sub>2</sub> } <sub>3</sub> Cl] | 63.3                    | 0                      | 34  |
| [K(18-crown-6)][Er(COT) <sub>2</sub> ]                                           | 216                     | 0                      | 35  |
| [K <sub>2</sub> (THF) <sub>4</sub> ][Er <sub>2</sub> (COT'') <sub>3</sub> ]      | 306                     | 0                      | 36  |
| [Er <sub>2</sub> (COT'') <sub>3</sub> ]                                          | 323                     | 0                      | 36  |
| K <sub>2</sub> (THF) <sub>4</sub> [Er <sub>2</sub> (COT) <sub>4</sub> ]          | 286                     | 0                      | 36  |
| (C <sub>5</sub> H <sub>5</sub> BMe)Er(COT)                                       | 421                     | 0                      | 37  |
| (C <sub>5</sub> H <sub>5</sub> BH)Er(COT)                                        | 371                     | 0                      | 37  |
| [Er(COT)(C <sub>5</sub> H <sub>5</sub> BNEt <sub>2</sub> )]                      | 250                     | 0                      | 37  |
| Er(COT)I(DMPE)                                                                   | 108                     | 0                      | 38  |
| (Cp*)Er(COT)                                                                     | 323; 197<br>(slow/fast) | 0                      | 39  |
| Er(COT)(Dsp)                                                                     | 358                     | 0                      | 40  |
| [Li(DME)] <sub>3</sub> [Er(COT'') <sub>2</sub> ]                                 | 187                     | 0                      | 41  |
| [K(18-crown-6)][Er(COT) <sub>2</sub> ]                                           | 286                     | 0                      | 42  |

\*dbpc<sup>-</sup> = tris(2,6-di-tert-butyl-p-cresolate); btmsm = tris(bis(trimethylsilyl)methyl) radical; COT = cyclooctatetraenide; DMPE = 1,2-Bis(dimethylphosphino)ethane; Dsp = 3,4-dimethyl-2,5-bis(trimethylsilyl)phospholyl, COT'' = 1,4-bis(trimethylsilyl)cyclooctatetraenyl and Cp\* = pentamethylcyclopenta-dienyl.

Table S2. Continuation of literature Yb(III)-based SMMs

| Compound                                                                                                                                                                                                    | $U_{eff}/k_B$ (K) | $H_{dc}$ (Oe) | Ref |
|-------------------------------------------------------------------------------------------------------------------------------------------------------------------------------------------------------------|-------------------|---------------|-----|
| [Yb(2,2'-bipyridine-1,1'-dioxide) <sub>4</sub> ] - M-CN bridged                                                                                                                                             | 9.4-20.6          | 800-1500      | 1   |
| [Yb(OPAd <sub>2</sub> Bz) <sub>2</sub> (H <sub>2</sub> O) <sub>4</sub> Cl]Cl <sub>2</sub> ·2THF                                                                                                             | 18.77             | 1000          | 2   |
| Yb <sub>4</sub> (Hquina) <sub>8</sub> (C <sub>2</sub> H <sub>5</sub> OH) <sub>2</sub> (H <sub>2</sub> O) <sub>6</sub> [(ClO <sub>4</sub> ) <sub>4</sub> ·4C <sub>2</sub> H <sub>5</sub> OH·H <sub>2</sub> O | 9.2-12.5          | 1000          | 3   |
| [Yb(QR1)(tta) <sub>2</sub> ]·CH <sub>3</sub> OH                                                                                                                                                             | 16.1              | 1000          | 4   |
| [{Yb(apdo)-(H <sub>2</sub> O) <sub>4</sub> }{Co(CN) <sub>6</sub> }]·2H <sub>2</sub> O                                                                                                                       | 15.8              | 700           | 5   |
| [Yb(H <sub>3</sub> Bmshp)(DMF) <sub>2</sub> Cl <sub>2</sub> ]·DMF·1.5H <sub>2</sub> O                                                                                                                       | 14.5              | 1500          | 6   |
| [Yb(μ <sub>3</sub> -OH)(na)(pyzc)] <sub>n</sub>                                                                                                                                                             | 14.4              | 3000          | 7   |
| [YbL <sub>3</sub> ]·CH <sub>3</sub> OH                                                                                                                                                                      | 11.7              | 1000          | 8   |
| [YbL] <sub>2</sub> (OTf) <sub>2</sub> (OTf)                                                                                                                                                                 | 11.7              | 1000          | 9   |
| β-Yb(2-qpH)(SO <sub>4</sub> )(H <sub>2</sub> O) <sub>2</sub>                                                                                                                                                | 11.5              | 2000          | 10  |
| [Yb <sub>2</sub> (hfac) <sub>6</sub> (H <sub>2</sub> SQ)]·0.5CH <sub>2</sub> Cl <sub>2</sub>                                                                                                                | 10                | 800           | 11  |
| [Yb(2,2'-bpdo) <sub>2</sub> (H <sub>2</sub> O)][Cu <sub>2</sub> (CN) <sub>5</sub> ]·5H <sub>2</sub> O                                                                                                       | 9.2               | 1000          | 12  |
| [Yb(Ph <sub>3</sub> PO) <sub>4</sub> (NO <sub>3</sub> ) <sub>2</sub> ](NO <sub>3</sub> )                                                                                                                    | 9.2               | 2500          | 13  |
| [YbZn <sub>2</sub> (SS/RR-L) <sub>2</sub> (H <sub>2</sub> O) <sub>4</sub> ](ClO <sub>4</sub> ) <sub>3</sub> ·5H <sub>2</sub> O                                                                              | 8.94              | 1000          | 14  |
| [YbFc <sub>3</sub> (THF) <sub>2</sub> Li <sub>2</sub> ] <sup>-</sup>                                                                                                                                        | 8.6               | 2000          | 15  |
| (Et <sub>3</sub> NH)[Yb(3-NO <sub>2</sub> -salen)]                                                                                                                                                          | 7.5               | 1500          | 16  |
| [Yb <sub>2</sub> (2-FBz) <sub>6</sub> (phen) <sub>2</sub> ]                                                                                                                                                 | 7.2               | 2000          | 17  |
| [Yb(H <sub>3</sub> L) <sub>2</sub> ]Cl <sub>3</sub> ·5CH <sub>3</sub> OH·2H <sub>2</sub> O                                                                                                                  | 7                 | 400           | 18  |
| [Yb(tta) <sub>3</sub> L]·2CH <sub>2</sub> Cl <sub>2</sub>                                                                                                                                                   | 6                 | 1000          | 19  |
| [Yb(H <sub>2</sub> O) <sub>3</sub> (18-crown-6)](ClO <sub>4</sub> ) <sub>3</sub>                                                                                                                            | 5.9               | 500           | 20  |
| [Yb(QR1) <sub>2</sub> ][NO <sub>3</sub> ]·(CH <sub>3</sub> OH)(H <sub>2</sub> O) <sub>0.5</sub>                                                                                                             | 5.37              | 1000          | 4   |
| [YbTp <sub>2</sub> NO <sub>3</sub> ]                                                                                                                                                                        | No fitting        | 2000          | 21  |
| [N(C <sub>2</sub> H <sub>5</sub> ) <sub>4</sub> ] <sub>3</sub> [Yb(dipic) <sub>3</sub> ]·nH <sub>2</sub> O                                                                                                  | No fitting        | 1000          | 22  |
| {[Yb(hfac) <sub>3</sub> ((S)-L <sup>1</sup> )] <sub>3</sub> } <sub>n</sub>                                                                                                                                  | Raman fit         | 1000          | 23  |
| {[Yb(hfac) <sub>3</sub> ((S,S,S)-L <sup>2</sup> )] <sub>3</sub> } <sub>n</sub>                                                                                                                              | Raman fit         | 1000          | 23  |
| {[Yb(hfac) <sub>3</sub> ((S)-L <sup>3</sup> )] <sub>3</sub> } <sub>n</sub>                                                                                                                                  | Raman fit         | 1000          | 23  |
| {[Yb(hfac) <sub>3</sub> ((S,S,S)-L <sup>4</sup> )] <sub>3</sub> } <sub>n</sub>                                                                                                                              | Raman fit         | 1000          | 23  |
| [Yb{N(SiMe <sub>3</sub> ) <sub>2</sub> }] <sub>3</sub>                                                                                                                                                      | Raman + QTM       | 1700          | 24  |
| [Yb{N(SiMe <sub>2</sub> H) <sub>2</sub> }] <sub>3</sub> ·(thf) <sub>2</sub>                                                                                                                                 | Raman + QTM       | 1700          | 24  |
| [Yb{N(SiMePh <sub>2</sub> ) <sub>2</sub> }] <sub>2</sub> [Al{OC(CF <sub>3</sub> ) <sub>3</sub> }] <sub>4</sub>                                                                                              | Raman +<br>Direct | 1600          | 25  |
| {Yb(4-pyridone) <sub>4</sub> [Fe(phen) <sub>2</sub> (CN) <sub>2</sub> ]} <sub>2</sub> (CF <sub>3</sub> SO <sub>3</sub> ) <sub>3</sub> ·solv                                                                 | Raman +<br>Direct | 800           | 26  |
| [YbCl <sub>3</sub> tpa]                                                                                                                                                                                     | Raman +<br>Direct | 2000          | 27  |
| [Yb(NO <sub>3</sub> ) <sub>3</sub> tpa]                                                                                                                                                                     | Raman +<br>Direct | 2000          | 27  |
| [Yb <sub>4</sub> (bpzch) <sub>2</sub> (fod) <sub>10</sub> ]                                                                                                                                                 | Raman             | 1500          | 28  |
| [YbCo(CN) <sub>6</sub> (bpyO <sub>2</sub> ) <sub>2</sub> (H <sub>2</sub> O) <sub>3</sub> ]·4H <sub>2</sub> O                                                                                                | Raman             | 1250          | 29  |
| [Yb(Br <sub>4</sub> Hcat) <sub>3</sub> tpa]                                                                                                                                                                 | Raman             | 1000          | 30  |
| [Yb(TPPO) <sub>3</sub> (NCS) <sub>3</sub> ]/[Yb(TPPO) <sub>3</sub> (NCSe) <sub>3</sub> ]                                                                                                                    | No Peaks          | up to<br>4000 | 31  |

## 2. Idealised Structure calculation for Yb(III) and Er(III)

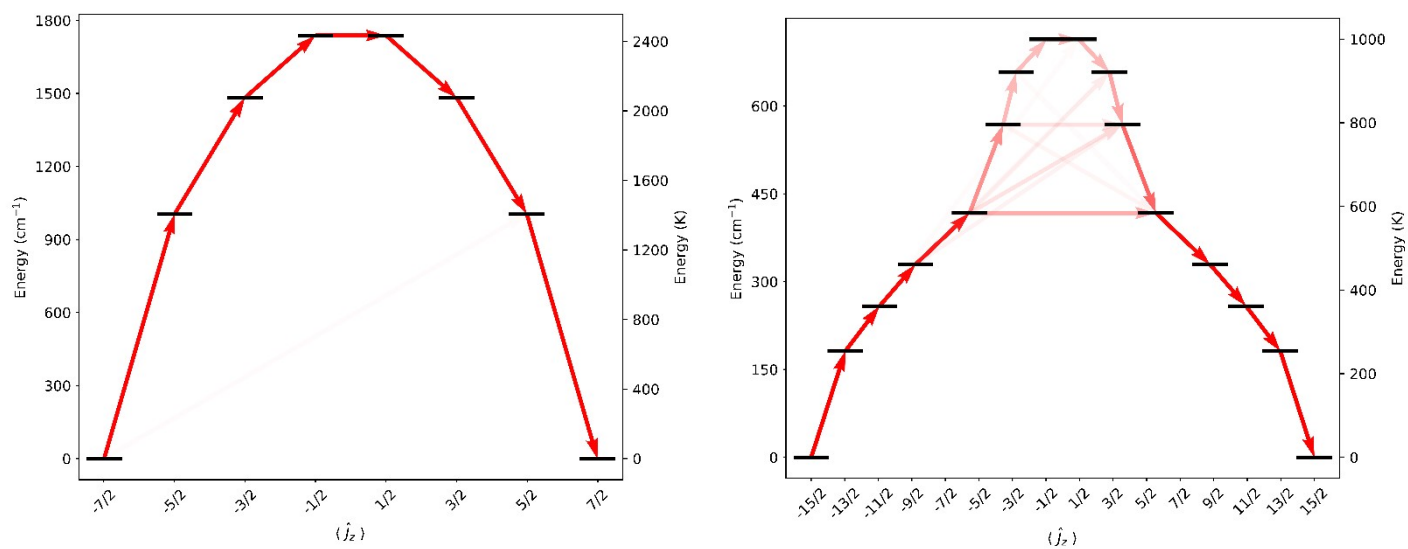

**Figure S1.** An energy barrier plot illustrating the relaxation process for YbF<sub>3</sub> (left) and ErF<sub>3</sub> (right).

Table S3. The expectation values for the probable transitions of wavefunction mixing for YbF<sub>3</sub>.

| States | WF1   | WF2   | WF3   | WF4   |
|--------|-------|-------|-------|-------|
| WF2    | 1.000 |       |       |       |
| WF3    | 0.000 | 1.320 |       |       |
| WF4    | 0.000 | 0.000 | 1.470 |       |
| WF-4   | 0.000 | 0.000 | 0.000 | 1.500 |
| WF-3   | 0.042 | 0.000 | 0.000 | 0.000 |
| WF-2   | 0.074 | 0.068 | 0.000 | 0.000 |
| WF-1   | 0.071 | 0.074 | 0.042 | 0.000 |

Table S4. Crystal field properties resulted from CASSCF-SO calculations for an idealised ErF<sub>3</sub> molecule in D<sub>3h</sub> point group symmetry.

| Crystal field              |            | g-tensor values         |                         |                | Angle | Wavefunction                                         |
|----------------------------|------------|-------------------------|-------------------------|----------------|-------|------------------------------------------------------|
| Energy (cm <sup>-1</sup> ) | Energy (K) | g <sub>x</sub>          | g <sub>y</sub>          | g <sub>z</sub> | (°)   | decomposition                                        |
| 0                          | 0          | 2.39 × 10 <sup>-8</sup> | 2.75 × 10 <sup>-8</sup> | 17.91          | --    | 100%   ± 15/2⟩                                       |
| 181                        | 261        | 2.35 × 10 <sup>-1</sup> | 2.35 × 10 <sup>-1</sup> | 15.47          | 0     | 99.8%   ± 13/2⟩;<br>0.2%   ± 1/2⟩                    |
| 259                        | 372        | 2.04 × 10 <sup>-1</sup> | 2.04 × 10 <sup>-1</sup> | 13.03          | 0     | 99.4%   ± 11/2⟩;<br>0.6%   ∓ 1/2⟩                    |
| 329                        | 474        | 7.78 × 10 <sup>-6</sup> | 1.74 × 10 <sup>-5</sup> | 10.46          | 0     | 98.2%   ± 9/2⟩;<br>1.8%   ∓ 3/2⟩                     |
| 417                        | 600        | 5.83                    | 5.83                    | 6.58           | 0     | 88%   ± 7/2⟩;<br>12%   ∓ 5/2⟩                        |
| 568                        | 818        | 5.82                    | 5.82                    | 4.18           | 0     | 88%   ± 5/2⟩;<br>12%   ∓ 7/2⟩                        |
| 657                        | 946        | 6.35 × 10 <sup>-5</sup> | 9.29 × 10 <sup>-5</sup> | 3.28           | 0     | 98.1%   ± 3/2⟩;<br>1.8%   ∓ 9/2⟩                     |
| 714                        | 1027       | 9.52                    | 9.52                    | 1.12           | 0     | 99.2%   ± 1/2⟩;<br>0.6%   ∓ 11/2⟩;<br>0.2%   ± 13/2⟩ |

Table S5. The expectation values for the probable transitions of wavefunction mixing for  $\text{ErF}_3$ .

| <b>States</b> | <b>WF1</b> | <b>WF2</b> | <b>WF3</b> | <b>WF4</b> | <b>WF5</b> | <b>WF6</b> | <b>WF7</b> | <b>WF8</b> |
|---------------|------------|------------|------------|------------|------------|------------|------------|------------|
| <b>WF2</b>    | 1.55       |            |            |            |            |            |            |            |
| <b>WF3</b>    | 0.00       | 2.11       |            |            |            |            |            |            |
| <b>WF4</b>    | 0.00       | 0.00       | 2.49       |            |            |            |            |            |
| <b>WF5</b>    | 0.00       | 0.00       | 0.00       | 2.71       |            |            |            |            |
| <b>WF6</b>    | 0.05       | 0.00       | 0.00       | 0.00       | 2.23       |            |            |            |
| <b>WF7</b>    | 0.04       | 0.10       | 0.00       | 0.00       | 0.00       | 3.00       |            |            |
| <b>WF8</b>    | 0.01       | 0.10       | 0.15       | 0.00       | 0.00       | 0.00       | 3.15       |            |
| <b>WF-8</b>   | 0.00       | 0.02       | 0.18       | 0.24       | 0.00       | 0.00       | 0.00       | 3.17       |
| <b>WF-7</b>   | 0.00       | 0.00       | 0.10       | 0.32       | 0.72       | 0.00       | 0.00       | 0.01       |
| <b>WF-6</b>   | 0.00       | 0.00       | 0.00       | 0.56       | 0.78       | 1.94       | 0.00       | 0.02       |
| <b>WF-5</b>   | 0.02       | 0.00       | 0.00       | 0.00       | 1.94       | 0.78       | 0.72       | 0.00       |
| <b>WF-4</b>   | 0.01       | 0.05       | 0.00       | 0.0        | 0.01       | 0.56       | 0.32       | 0.24       |
| <b>WF-3</b>   | 0.02       | 0.09       | 0.07       | 0.00       | 0.00       | 0.00       | 0.10       | 0.18       |
| <b>WF-2</b>   | 0.00       | 0.08       | 0.09       | 0.05       | 0.00       | 0.00       | 0.00       | 0.02       |
| <b>WF-1</b>   | 0.00       | 0.00       | 0.02       | 0.01       | 0.02       | 0.00       | 0.00       | 0.00       |

Table S6. Crystal field properties resulted from CASSCF-SO calculations for an idealised  $\text{YbF}_4$  molecule in  $D_{4h}$  point group symmetry.

| Crystal field               |            | g-tensor values       |                       |       | Angle        | Wavefunction                                             |
|-----------------------------|------------|-----------------------|-----------------------|-------|--------------|----------------------------------------------------------|
| Energy ( $\text{cm}^{-1}$ ) | Energy (K) | $g_x$                 | $g_y$                 | $g_z$ | ( $^\circ$ ) | decomposition                                            |
| 0                           | 0          | $2.91 \times 10^{-2}$ | $2.91 \times 10^{-2}$ | 7.89  | --           | $99.3\%   \pm 7/2 \rangle;$<br>$0.7\%   \mp 1/2 \rangle$ |
| 1356                        | 1951       | 2.05                  | 2.05                  | 4.95  | 0            | $92.7\%   \pm 5/2 \rangle;$<br>$7.3\%   \mp 3/2 \rangle$ |
| 2114                        | 3041       | 2.07                  | 2.07                  | 2.72  | 0            | $92.7\%   \pm 3/2 \rangle;$<br>$7.3\%   \mp 5/2 \rangle$ |
| 2433                        | 3500       | 4.52                  | 4.52                  | 1.05  | 0            | $99.3\%   \pm 1/2 \rangle;$<br>$0.7\%   \mp 7/2 \rangle$ |

Table S7. Crystal field properties resulted from CASSCF-SO calculations for an idealised ErF<sub>4</sub> molecule in *D*<sub>4h</sub> point group symmetry.

| Crystal field              |            | <i>g</i> -tensor values |                         |                       | Angle | Wavefunction decomposition                                              |
|----------------------------|------------|-------------------------|-------------------------|-----------------------|-------|-------------------------------------------------------------------------|
| Energy (cm <sup>-1</sup> ) | Energy (K) | <i>g</i> <sub>x</sub>   | <i>g</i> <sub>y</sub>   | <i>g</i> <sub>z</sub> | (°)   |                                                                         |
| 0                          | 0          | 8.94 × 10 <sup>-3</sup> | 8.94 × 10 <sup>-3</sup> | 17.81                 | --    | 99.1%   ± 15/2);<br>0.9%   ± 7/2)                                       |
| 275                        | 395        | 2.24 × 10 <sup>-2</sup> | 2.24 × 10 <sup>-2</sup> | 15.37                 | 0     | 99.0%   ± 13/2);<br>0.9%   ± 5/2);<br>0.1%   ∓ 3/2)                     |
| 376                        | 541        | 0.170                   | 0.170                   | 13.06                 | 0     | 99.6%   ± 11/2);<br>0.3%   ± 3/2);<br>0.1%   ∓ 5/2)                     |
| 437                        | 629        | 4.73                    | 4.73                    | 8.71                  | 0     | 86.4%   ± 9/2);<br>7.1%   ∓ 7/2);<br>6.4%   ± 1/2);<br>0.1%   ∓ 15/2)   |
| 548                        | 789        | 4.27                    | 4.27                    | 5.50                  | 0     | 90.3%   ± 7/2);<br>11.3%   ∓ 9/2);<br>7.7%   ∓ 1/2);<br>0.8%   ± 15/2); |
| 603                        | 868        | 8.65                    | 8.65                    | 2.73                  | 0     | 64.8%   ± 5/2);<br>34.0%   ∓ 3/2);<br>1%   ± 13/2);<br>0.3%   ∓ 11/2)   |
| 1083                       | 1559       | 8.77                    | 8.77                    | 0.286                 | 0     | 65.6%   ± 3/2);<br>34.2%   ∓ 5/2);<br>0.1%   ∓ 13/2)                    |
| 1094                       | 1574       | 9.08                    | 9.08                    | 0.280                 | 0     | 85.9%   ± 1/2);<br>11.8%   ∓ 7/2);<br>2.4%   ± 13/2)                    |

Table S8. Crystal field properties resulted from CASSCF-SO calculations for an idealised YbF<sub>5</sub> molecule in  $D_{5h}$  point group symmetry.

| Crystal field              |            | g-tensor values       |                       |       | Angle | Wavefunction      |
|----------------------------|------------|-----------------------|-----------------------|-------|-------|-------------------|
| Energy (cm <sup>-1</sup> ) | Energy (K) | $g_x$                 | $g_y$                 | $g_z$ | (°)   | decomposition     |
| 0                          | 0          | $2.85 \times 10^{-6}$ | $2.85 \times 10^{-6}$ | 7.96  | --    | 100%  $\pm 7/2$ ⟩ |
| 1598                       | 2300       | $2.15 \times 10^{-6}$ | $7.43 \times 10^{-6}$ | 5.59  | 0     | 100%  $\pm 5/2$ ⟩ |
| 2386                       | 3433       | $8.04 \times 10^{-7}$ | $1.02 \times 10^{-5}$ | 3.37  | 0     | 100%  $\pm 3/2$ ⟩ |
| 2815                       | 4051       | 4.54                  | 4.54                  | 1.10  | 0     | 100%  $\pm 1/2$ ⟩ |

Table S9. Crystal field properties resulted from CASSCF-SO calculations for an idealised ErF<sub>5</sub> molecule in  $D_{5h}$  point group symmetry.

| Crystal field              |            | g-tensor values       |                       |       | Angle | Wavefunction       |
|----------------------------|------------|-----------------------|-----------------------|-------|-------|--------------------|
| Energy (cm <sup>-1</sup> ) | Energy (K) | $g_x$                 | $g_y$                 | $g_z$ | (°)   | decomposition      |
| 0                          | 0          | $1.26 \times 10^{-9}$ | $1.45 \times 10^{-9}$ | 17.90 | --    | 100%  $\pm 15/2$ ⟩ |
| 326                        | 469        | $1.08 \times 10^{-8}$ | $1.27 \times 10^{-8}$ | 15.47 | 0     | 100%  $\pm 13/2$ ⟩ |
| 450                        | 648        | $1.69 \times 10^{-2}$ | $1.69 \times 10^{-2}$ | 13.10 | 0     | 100%  $\pm 11/2$ ⟩ |
| 558                        | 802        | $1.69 \times 10^{-2}$ | $1.69 \times 10^{-2}$ | 10.70 | 0     | 100%  $\pm 9/2$ ⟩  |
| 710                        | 1022       | $4.21 \times 10^{-5}$ | $4.33 \times 10^{-5}$ | 8.28  | 0     | 100%  $\pm 7/2$ ⟩  |
| 893                        | 1284       | $3.60 \times 10^{-5}$ | $4.93 \times 10^{-5}$ | 5.88  | 0     | 100%  $\pm 5/2$ ⟩  |
| 1058                       | 1523       | $1.55 \times 10^{-5}$ | $2.88 \times 10^{-5}$ | 3.51  | 0     | 100%  $\pm 3/2$ ⟩  |
| 1157                       | 1665       | 9.54                  | 9.54                  | 1.16  | 0     | 100%  $\pm 1/2$ ⟩  |

Table S10. Crystal field properties resulted from CASSCF-SO calculations for an idealised YbF<sub>6</sub> molecule in  $D_{6h}$  point group symmetry.

| Crystal field              |            | g-tensor values       |                       |       | Angle | Wavefunction                             |
|----------------------------|------------|-----------------------|-----------------------|-------|-------|------------------------------------------|
| Energy (cm <sup>-1</sup> ) | Energy (K) | $g_x$                 | $g_y$                 | $g_z$ | (°)   | decomposition                            |
| 0                          | 0          | 0.821                 | 0.821                 | 7.73  | --    | 98.5%  $\pm 7/2$ ⟩;<br>1.5%  $\mp 5/2$ ⟩ |
| 1992                       | 2866       | 0.771                 | 0.771                 | 5.36  | 0     | 98.5%  $\pm 5/2$ ⟩;<br>1.5%  $\mp 7/2$ ⟩ |
| 2918                       | 4198       | $1.74 \times 10^{-6}$ | $6.27 \times 10^{-6}$ | 3.36  | 0     | 100%  $\pm 3/2$ ⟩                        |

|      |      |      |      |      |   |                           |
|------|------|------|------|------|---|---------------------------|
| 3419 | 4919 | 4.54 | 4.54 | 1.10 | 0 | 100%  $\pm 1/2$ $\rangle$ |
|------|------|------|------|------|---|---------------------------|

Table S11. Crystal field properties resulted from CASSCF-SO calculations for an idealised ErF<sub>6</sub> molecule in  $D_{6h}$  point group symmetry.

| Crystal field              |            | g-tensor values       |                       |       | Angle | Wavefunction                                                                               |
|----------------------------|------------|-----------------------|-----------------------|-------|-------|--------------------------------------------------------------------------------------------|
| Energy (cm <sup>-1</sup> ) | Energy (K) | $g_x$                 | $g_y$                 | $g_z$ | (°)   | decomposition                                                                              |
| 0                          | 0          | $1.42 \times 10^{-7}$ | $9.51 \times 10^{-7}$ | 17.79 | --    | 99.4%  $\pm 15/2$ $\rangle$ ;<br>0.5%  $\pm 3/2$ $\rangle$ ;<br>0.1%  $\mp 9/2$ $\rangle$  |
| 339                        | 487        | 3.58                  | 3.58                  | 12.83 | 0     | 88.5%  $\pm 13/2$ $\rangle$ ;<br>6.9%  $\mp 11/2$ $\rangle$ ;<br>4.6%  $\pm 1/2$ $\rangle$ |
| 470                        | 676        | 3.22                  | 3.22                  | 9.80  | 0     | 86.4%  $\pm 11/2$ $\rangle$ ;<br>9.3%  $\mp 13/2$ $\rangle$ ;<br>4.2%  $\mp 1/2$ $\rangle$ |
| 521                        | 749        | $2.35 \times 10^{-5}$ | $1.26 \times 10^{-4}$ | 8.31  | 0     | 83.7%  $\pm 9/2$ $\rangle$ ;<br>16.0%  $\mp 7/2$ $\rangle$ ;<br>0.3%  $\mp 15/2$ $\rangle$ |
| 573                        | 824        | 8.56                  | 8.56                  | 3.17  | 0     | 64.0%  $\pm 7/2$ $\rangle$ ;<br>36.0%  $\mp 5/2$ $\rangle$                                 |
| 1357                       | 1952       | 8.51                  | 8.51                  | 0.78  | 0     | 64.0%  $\pm 5/2$ $\rangle$ ;<br>36.0%  $\mp 7/2$ $\rangle$                                 |
| 1423                       | 2047       | $1.67 \times 10^{-5}$ | $1.64 \times 10^{-4}$ | 1.23  | 0     | 83.5%  $\pm 3/2$ $\rangle$ ;<br>16.2%  $\mp 9/2$ $\rangle$ ;<br>0.3%  $\pm 15/2$ $\rangle$ |
| 1484                       | 2135       | 9.16                  | 9.16                  | 0.509 | 0     | 91.2%  $\pm 1/2$ $\rangle$ ;<br>6.7%  $\mp 11/2$ $\rangle$ ;<br>2.1%  $\pm 13/2$ $\rangle$ |

Figure S2. Energy barrier for an idealised YbF<sub>8</sub> molecule in  $D_{4d}$  point group symmetry with a Z-displacement of 0.5 Å and plane angles of 73.8°.

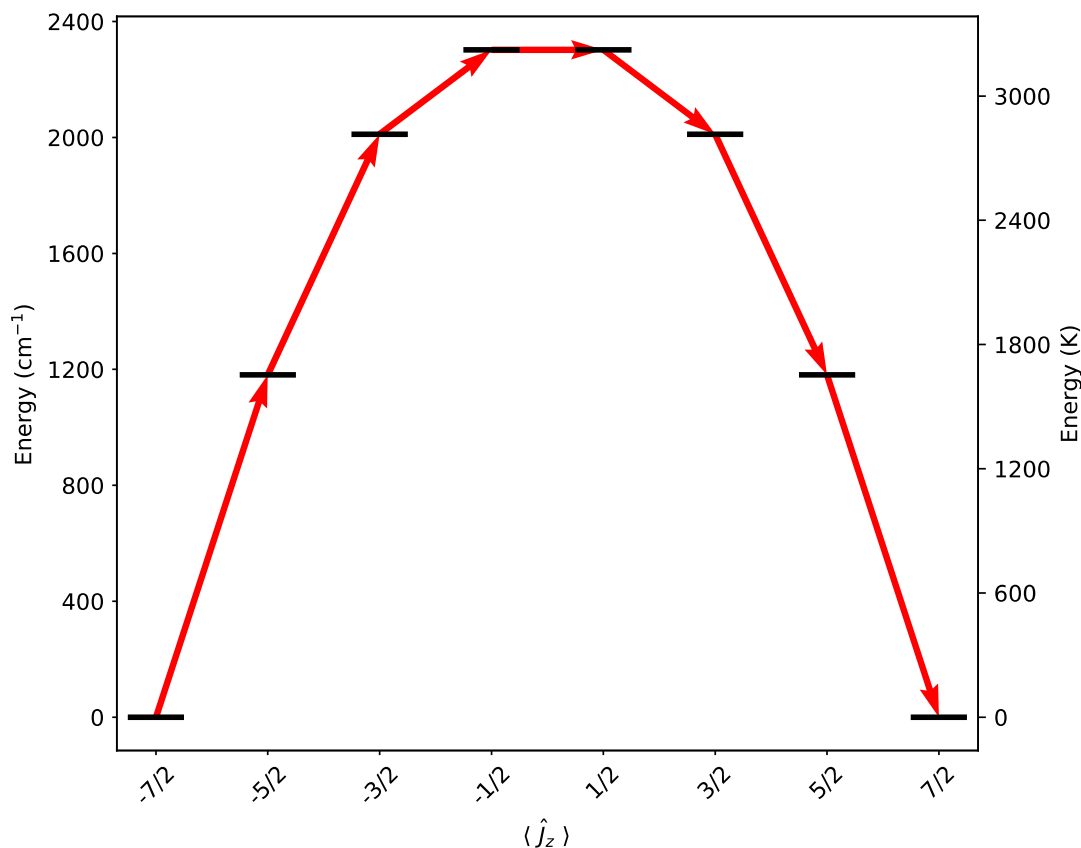

Table S12. Crystal field properties resulted from CASSCF-SO calculations for an idealised YbF<sub>8</sub> molecule in  $D_{4d}$  point group symmetry with a Z-displacement of 0.5 Å and plane angles of 73.8° and GS  $\tau_{\text{QTM}} = 6448$  s.

| Crystal field              |            | $g$ -tensor values    |                       |       | Angle | Wavefunction      |
|----------------------------|------------|-----------------------|-----------------------|-------|-------|-------------------|
| Energy (cm <sup>-1</sup> ) | Energy (K) | $g_x$                 | $g_y$                 | $g_z$ | (°)   | decomposition     |
| 0                          | 0          | $2.10 \times 10^{-6}$ | $2.10 \times 10^{-6}$ | 7.96  | --    | 100%  $\pm 7/2$ ⟩ |
| 1181                       | 1700       | $4.86 \times 10^{-6}$ | $8.93 \times 10^{-6}$ | 5.61  | 0     | 100%  $\pm 5/2$ ⟩ |
| 2011                       | 2894       | $9.50 \times 10^{-5}$ | $1.10 \times 10^{-4}$ | 3.35  | 0     | 100%  $\pm 3/2$ ⟩ |
| 2302                       | 3313       | 4.56                  | 4.56                  | 1.14  | 0     | 100%  $\pm 1/2$ ⟩ |

**Figure S3.** Energy barrier for an idealised YbF<sub>8</sub> molecule in  $D_{4d}$  point group symmetry with a Z-displacement of 1.0 Å and plane angles of 61.7°.

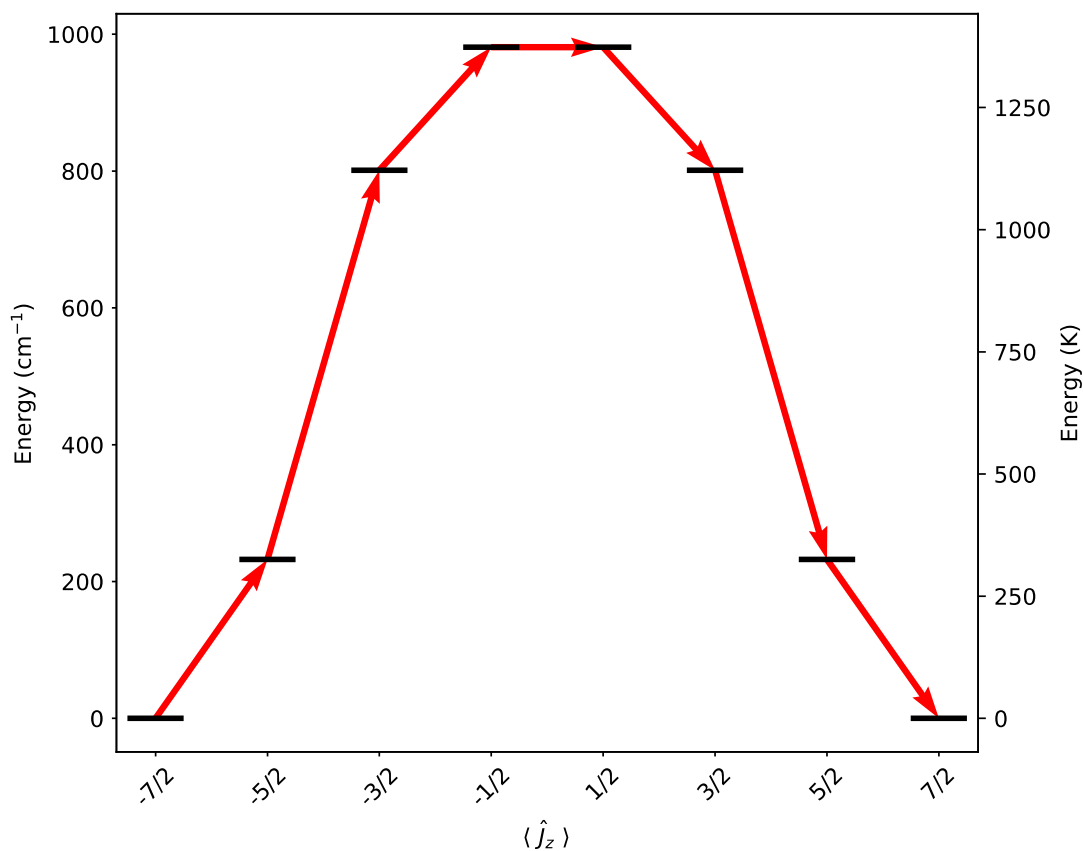

**Table S13.** Crystal field properties resulted from CASSCF-SO calculations for an idealised YbF<sub>8</sub> molecule in  $D_{4d}$  point group symmetry with a Z-displacement of 1.0 Å and plane angles of 61.7° and GS  $\tau_{\text{QTM}} = 198$  s.

| Crystal field              |            | g-tensor values       |                       |       | Angle | Wavefunction              |
|----------------------------|------------|-----------------------|-----------------------|-------|-------|---------------------------|
| Energy (cm <sup>-1</sup> ) | Energy (K) | $g_x$                 | $g_y$                 | $g_z$ | (°)   | decomposition             |
| 0                          | 0          | $1.20 \times 10^{-5}$ | $1.20 \times 10^{-5}$ | 7.97  | --    | 100%  $\pm 7/2$ $\rangle$ |
| 232                        | 334        | $3.73 \times 10^{-6}$ | $1.99 \times 10^{-5}$ | 5.67  | 0     | 100%  $\pm 5/2$ $\rangle$ |
| 801                        | 1153       | $2.38 \times 10^{-6}$ | $1.36 \times 10^{-5}$ | 3.35  | 0     | 100%  $\pm 3/2$ $\rangle$ |
| 981                        | 1411       | 4.56                  | 4.56                  | 1.15  | 0     | 100%  $\pm 1/2$ $\rangle$ |

**Figure S4.** Energy barrier for an idealised  $\text{YbF}_8$  molecule in  $D_{4d}$  point group symmetry with a Z-displacement of 1.5 Å and plane angles of 44.8°.

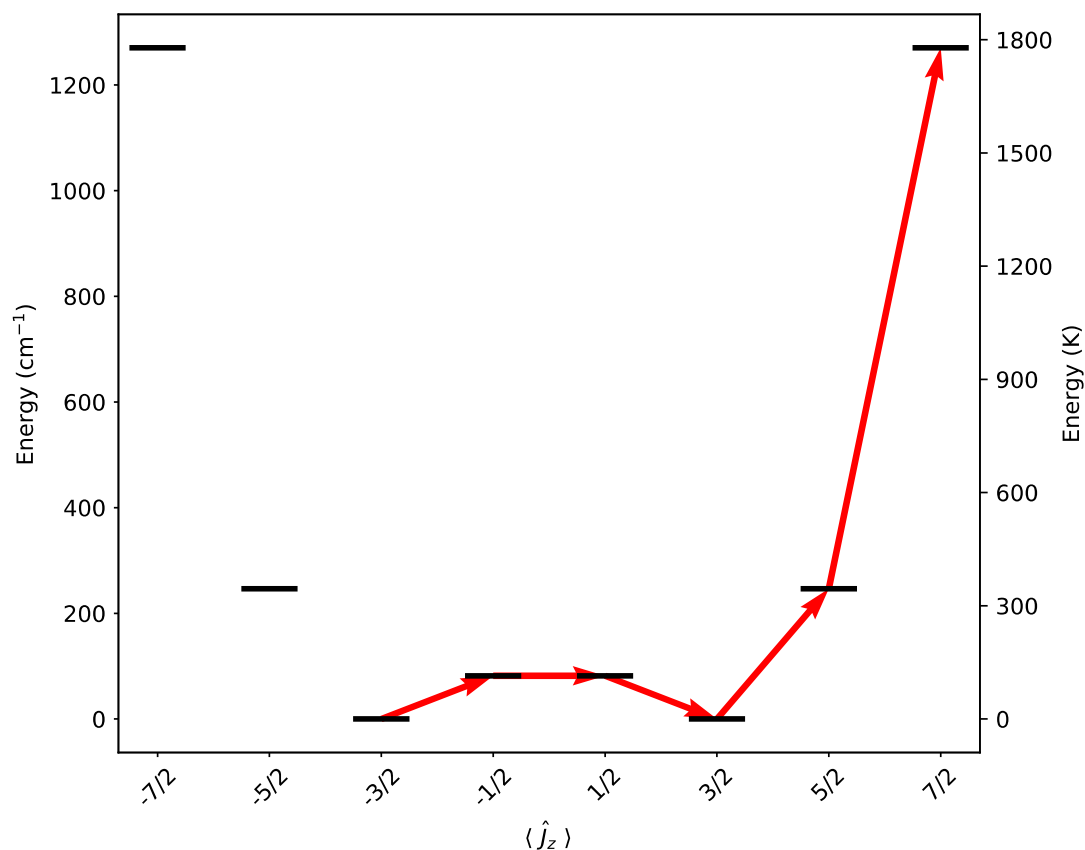

**Table S14.** Crystal field properties resulted from CASSCF-SO calculations for an idealised  $\text{YbF}_8$  molecule in  $D_{4d}$  point group symmetry with a Z-displacement of 1.5 Å and plane angles of 44.8°.

| Crystal field               |            | $g$ -tensor values    |                       |       | Angle | Wavefunction           |
|-----------------------------|------------|-----------------------|-----------------------|-------|-------|------------------------|
| Energy ( $\text{cm}^{-1}$ ) | Energy (K) | $g_x$                 | $g_y$                 | $g_z$ | (°)   | decomposition          |
| 0                           | 0          | $3.80 \times 10^{-6}$ | $2.36 \times 10^{-5}$ | 3.43  | --    | 100% $ \pm 3/2\rangle$ |
| 82                          | 118        | 4.55                  | 4.55                  | 1.12  | 0     | 100% $ \pm 1/2\rangle$ |
| 247                         | 355        | $1.03 \times 10^{-5}$ | $1.75 \times 10^{-5}$ | 5.74  | 0     | 100% $ \pm 5/2\rangle$ |
| 1270                        | 1828       | $3.25 \times 10^{-6}$ | $3.25 \times 10^{-6}$ | 7.99  | 0     | 100% $ \pm 7/2\rangle$ |

**Figure S5.** Energy barrier for an idealised YbF<sub>8</sub> molecule in  $D_{4d}$  point group symmetry with a Z-displacement of 1.1 Å and plane angles of 58.7°.

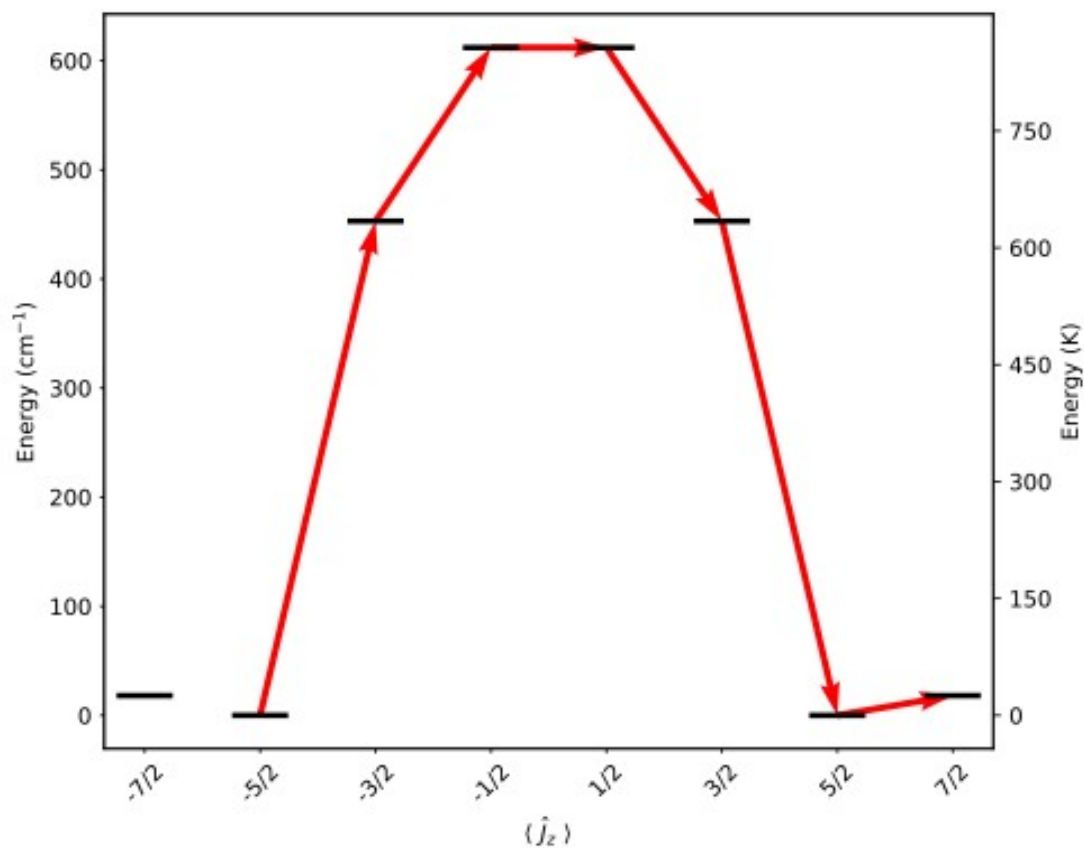

**Table S15.** Crystal field properties resulted from CASSCF-SO calculations for an idealised YbF<sub>8</sub> molecule in  $D_{4d}$  point group symmetry with a Z-displacement of 1.1 Å and plane angles of 58.7°.

| Crystal field              |            | <i>g</i> -tensor values |                       |                       | Angle | Wavefunction  |
|----------------------------|------------|-------------------------|-----------------------|-----------------------|-------|---------------|
| Energy (cm <sup>-1</sup> ) | Energy (K) | <i>g</i> <sub>x</sub>   | <i>g</i> <sub>y</sub> | <i>g</i> <sub>z</sub> | (°)   | decomposition |
| 0                          | 0          | $9.19 \times 10^{-5}$   | $1.16 \times 10^{-4}$ | 5.69                  | --    | 100%   ± 5/2⟩ |
| 18                         | 26         | $1.04 \times 10^{-4}$   | $1.04 \times 10^{-4}$ | 7.98                  | 0     | 100%   ± 7/2⟩ |
| 453                        | 652        | $4.63 \times 10^{-6}$   | $1.98 \times 10^{-5}$ | 3.36                  | 0     | 100%   ± 3/2⟩ |
| 612                        | 881        | 4.56                    | 4.56                  | 1.15                  | 0     | 100%   ± 1/2⟩ |

### 3. Computational variations

To investigate whether the dramatic underperformance of  $\text{YbF}_x$  compared to  $\text{ErF}_x$  could be caused by an overlooked computational parameter, we exchanged various parameters between the different metals. The parameters we investigated was switching the Ln-F bond lengths, exchanging optimised orbitals and swapping basis sets. We also investigated basis set size effects and the addition of CASPT2 to the computational pipeline.

Swapping bond lengths found an overall minor increase in Yb(III) QTM times and a minor decrease in Er(III) QTM times. This can be contextualised as the longer Ln-F bond reduces crystal field interactions with the 4f orbitals that cause wavefunction mixing. However, the change does not significantly affect the several orders of magnitude discrepancy between Er(III) and Yb(III), with results all within an order of magnitude of the original calculations.

In order to swap the optimised orbital, the RasOrb file for the corresponding  $\text{ErF}_x$  calculation was used with additional of the CIONLY key word for the  $\text{YbF}_x$  calculation. This ensures that if any errors were generated during a RASSCF optimisation for Yb, they would now be avoided. When the optimised orbitals were swapped between analogous  $\text{LnF}_x$  compounds, we found a small improvement in Er(III) QTM times and a reduction of Yb(III) QTM times. Again, this can be interpreted since Yb(III) is smaller than the Er(III) ion due to lanthanoid contraction. The basis functions would reflect this and hence the Yb(III) optimised orbitals would be closer to the nucleus and further from the fluoride ions. This would lead to weaker crystal field interactions that could distort the 4f orbitals, minimising the wavefunction mixing found for the  $\text{ErF}_{x\text{-orb}}$  calculations and increasing QTM times.

For the basis exchange, the ANORCC basis contraction parameters were manually input for the opposite ion, that is Yb basis contractions for the Er calculation and *vice versa*. Exchanging basis sets had a minimal effect on the QTM times. There was a slight reduction of the QTM times of the Er(III) compounds with the Yb(III) basis set and an increase in the Yb(III) QTM times with Er(III) basis set. However, due to the small magnitude of the change, we do not consider it a significant factor in affecting QTM time.

With these variations, we see no change large enough to justify the discrepancy between Er(III) and Yb(III) QTM time as originating from the computational method. This supports our conclusion that Yb(III) has inherently faster QTM times compared to Er(III).

The introduction of CASPT2 had a minor effect on the Yb(III) compounds, with  $\text{YbF}_3$  and  $\text{YbF}_5$  improving QTM time with CASPT2, while  $\text{YbF}_4$  and  $\text{YbF}_6$  gave faster QTM time. In the case of Yb(III), CASPT2 does not show a systematic impact on the QTM time. However, for Er(III), the introduction of CASPT2 caused around 10 orders of magnitude reduction in QTM time. Surprisingly  $\text{ErF}_5$  has worse computed QTM time than  $\text{YbF}_5$  with the introduction of CASPT2. However, aside from Yb(III), CASPT2 is known to provide less accurate description of the ground states of Ln(III) compounds. Hence, we believe that CASPT2 in Er(III) causes erroneous wavefunction mixing, leading to worse QTM times.

## Basis Size

Table S16. The comparison of the anisotropy and  $\tau_{QTM}$  between  $\mathbf{Yb}_{\text{step}}$  and  $\mathbf{Yb}_{\text{equal}}$  with central ion basis described by VDZP, VTZP or VQZP basis sets.

|                        | $\mathbf{Yb}_{\text{step}}$ |       |       |                       | $\mathbf{Yb}_{\text{equal}}$ |       |       |                       |
|------------------------|-----------------------------|-------|-------|-----------------------|------------------------------|-------|-------|-----------------------|
|                        | <i>g</i> -tensor values     |       |       | QTM                   | <i>g</i> -tensor values      |       |       | QTM                   |
|                        | $g_x$                       | $g_y$ | $g_z$ | (s)                   | $g_x$                        | $g_y$ | $g_z$ | (s)                   |
| $\text{LnF}_3$<br>VDZP | 0.247                       | 0.247 | 7.94  | $4.65 \times 10^{-7}$ | 0.236                        | 0.236 | 7.95  | $5.10 \times 10^{-7}$ |
| $\text{LnF}_3$<br>VTZP | 0.213                       | 0.213 | 7.95  | $6.26 \times 10^{-7}$ | 0.188                        | 0.188 | 7.96  | $8.05 \times 10^{-7}$ |
| $\text{LnF}_3$<br>VQZP | 0.180                       | 0.180 | 7.96  | $8.78 \times 10^{-7}$ | 0.178                        | 0.178 | 7.96  | $8.98 \times 10^{-7}$ |

## CASPT2

Table S17. Crystal field properties resulted from CASPT2 calculations for an  $\text{YbF}_3$  molecule in  $D_{3h}$  point group symmetry.

| Crystal field               |            | g-tensor values       |                       |       | Angle        | Wavefunction                                         |
|-----------------------------|------------|-----------------------|-----------------------|-------|--------------|------------------------------------------------------|
| Energy ( $\text{cm}^{-1}$ ) | Energy (K) | $g_x$                 | $g_y$                 | $g_z$ | ( $^\circ$ ) | decomposition                                        |
| 0                           | 0          | 0.213                 | 0.213                 | 7.95  | --           | $99.95\% \pm 7/2\rangle;$<br>$0.05\% \mp 5/2\rangle$ |
| 1312                        | 1888       | 0.204                 | 0.204                 | 5.63  | 0            | $99.95\% \pm 5/2\rangle;$<br>$0.05\% \mp 7/2\rangle$ |
| 1822                        | 2621       | $2.12 \times 10^{-6}$ | $1.49 \times 10^{-5}$ | 3.39  | 0            | $100\% \pm 3/2\rangle$                               |
| 2109                        | 3035       | 4.55                  | 4.55                  | 1.12  | 0            | $100\% \pm 1/2\rangle$                               |

Table S18. Crystal field properties resulted from CASPT2 calculations for an  $\text{YbF}_4$  molecule in  $D_{4h}$  point group symmetry.

| Crystal field               |            | g-tensor values       |                       |       | Angle        | Wavefunction                                        |
|-----------------------------|------------|-----------------------|-----------------------|-------|--------------|-----------------------------------------------------|
| Energy ( $\text{cm}^{-1}$ ) | Energy (K) | $g_x$                 | $g_y$                 | $g_z$ | ( $^\circ$ ) | decomposition                                       |
| 0                           | 0          | $5.50 \times 10^{-2}$ | $5.50 \times 10^{-2}$ | 7.83  | --           | $98.7\% \pm 7/2\rangle;$<br>$1.3\% \mp 1/2\rangle$  |
| 1748                        | 2515       | 2.75                  | 2.75                  | 4.28  | 0            | $85.6\% \pm 5/2\rangle;$<br>$14.4\% \mp 3/2\rangle$ |
| 2774                        | 3991       | 2.78                  | 2.78                  | 2.09  | 0            | $85.6\% \pm 3/2\rangle;$<br>$14.4\% \mp 5/2\rangle$ |
| 3083                        | 4436       | 4.49                  | 4.49                  | 0.983 | 0            | $98.7\% \pm 1/2\rangle;$<br>$1.3\% \mp 7/2\rangle$  |

Table S19. Crystal field properties resulted from CASPT2 calculations for an YbF<sub>5</sub> molecule in *D*<sub>5h</sub> point group symmetry.

| Crystal field              |            | <i>g</i> -tensor values |                         |                       | Angle | Wavefunction decomposition |
|----------------------------|------------|-------------------------|-------------------------|-----------------------|-------|----------------------------|
| Energy (cm <sup>-1</sup> ) | Energy (K) | <i>g</i> <sub>x</sub>   | <i>g</i> <sub>y</sub>   | <i>g</i> <sub>z</sub> | (°)   |                            |
| 0                          | 0          | 1.58 × 10 <sup>-6</sup> | 2.95 × 10 <sup>-6</sup> | 7.96                  | --    | 100%   ± 7/2⟩              |
| 2049                       | 2948       | 1.34 × 10 <sup>-2</sup> | 1.34 × 10 <sup>-2</sup> | 5.55                  | 0     | 100%   ± 5/2⟩              |
| 2963                       | 4264       | 1.39 × 10 <sup>-2</sup> | 1.39 × 10 <sup>-2</sup> | 3.37                  | 0     | 100%   ± 3/2⟩              |
| 3457                       | 4974       | 4.54                    | 4.53                    | 1.09                  | 0     | 100%   ± 1/2⟩              |

Table S20. Crystal field properties resulted from CASPT2 calculations for an YbF<sub>6</sub> molecule in *D*<sub>6h</sub> point group symmetry.

| Crystal field              |            | <i>g</i> -tensor values |                         |                       | Angle | Wavefunction decomposition       |
|----------------------------|------------|-------------------------|-------------------------|-----------------------|-------|----------------------------------|
| Energy (cm <sup>-1</sup> ) | Energy (K) | <i>g</i> <sub>x</sub>   | <i>g</i> <sub>y</sub>   | <i>g</i> <sub>z</sub> | (°)   |                                  |
| 0                          | 0          | 1.17                    | 1.17                    | 7.48                  | --    | 97.0%   ± 7/2⟩;<br>3.0%   ∓ 5/2⟩ |
| 2703                       | 3888       | 1.08                    | 1.10                    | 5.11                  | 0     | 97.0%   ± 5/2⟩;<br>3.0%   ∓ 7/2⟩ |
| 3772                       | 5427       | 1.16 × 10 <sup>-2</sup> | 1.23 × 10 <sup>-2</sup> | 3.35                  | 0     | 100%   ± 3/2⟩                    |
| 4356                       | 6267       | 4.53                    | 4.53                    | 1.09                  | 0     | 100%   ± 1/2⟩                    |

Table S21. The comparison of the anisotropy and  $\tau_{QTM}$  between  $\mathbf{Yb}_{\text{bond}}$  and  $\mathbf{Er}_{\text{bond}}$  structures with exchange in bond lengths.

|                | $\mathbf{Yb}_{\text{bond}}$ |                       |       |                       | $\mathbf{Er}_{\text{bond}}$ |                       |       |                       |
|----------------|-----------------------------|-----------------------|-------|-----------------------|-----------------------------|-----------------------|-------|-----------------------|
|                | <i>g</i> -tensor values     |                       |       | QTM                   | <i>g</i> -tensor values     |                       |       | QTM                   |
|                | $g_x$                       | $g_y$                 | $g_z$ | (s)                   | $g_x$                       | $g_y$                 | $g_z$ | (s)                   |
| $\text{LnF}_3$ | 0.207                       | 0.207                 | 7.96  | $6.62 \times 10^{-7}$ | $2.33 \times 10^{-8}$       | $3.83 \times 10^{-8}$ | 17.91 | $6.36 \times 10^7$    |
| $\text{LnF}_4$ | $2.66 \times 10^{-2}$       | $2.66 \times 10^{-2}$ | 7.90  | $3.98 \times 10^{-5}$ | $1.15 \times 10^{-2}$       | $1.15 \times 10^{-2}$ | 17.79 | $4.83 \times 10^{-4}$ |
| $\text{LnF}_5$ | $2.62 \times 10^{-6}$       | $2.62 \times 10^{-6}$ | 7.96  | 4130                  | $2.26 \times 10^{-9}$       | $2.41 \times 10^{-9}$ | 17.89 | $1.17 \times 10^{10}$ |
| $\text{LnF}_6$ | 0.774                       | 0.774                 | 7.75  | $4.67 \times 10^{-8}$ | $1.29 \times 10^{-6}$       | $3.74 \times 10^{-6}$ | 17.76 | 8107                  |

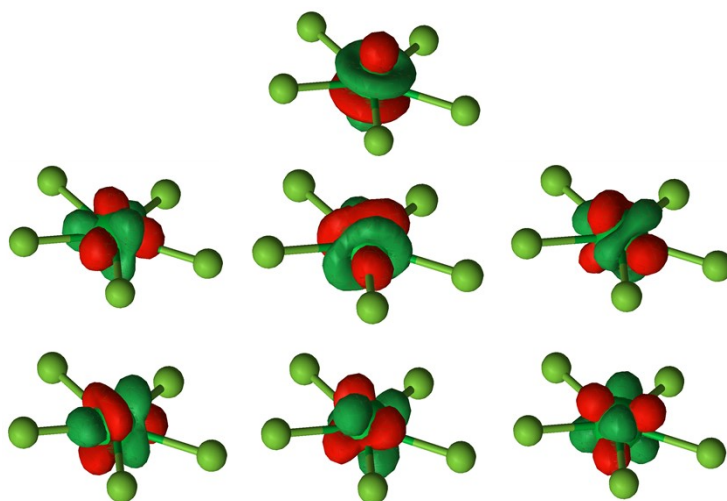

**Figure S6.** The different optimised active space orbitals shown for  $\text{YbF}_5$  clearly indicating the 4f orbitals as the active space.

Table S22. The comparison of the anisotropy and  $\tau_{QTM}$  between Yb(III) and Er(III) structures with exchange in optimised orbital definitions.

|                        | <b>Yb<sub>orb</sub></b> |                       |                      |                       | <b>Er<sub>orb</sub></b> |                        |                      |                       |
|------------------------|-------------------------|-----------------------|----------------------|-----------------------|-------------------------|------------------------|----------------------|-----------------------|
|                        | <i>g</i> -tensor values |                       |                      | QTM                   | <i>g</i> -tensor values |                        |                      | QTM                   |
|                        | <i>g<sub>x</sub></i>    | <i>g<sub>y</sub></i>  | <i>g<sub>z</sub></i> | (s)                   | <i>g<sub>x</sub></i>    | <i>g<sub>y</sub></i>   | <i>g<sub>z</sub></i> | (s)                   |
| <b>LnF<sub>3</sub></b> | 0.379                   | 0.379                 | 7.92                 | $1.97 \times 10^{-7}$ | $2.24 \times 10^{-8}$   | $4.34 \times 10^{-8}$  | 17.91                | $5.37 \times 10^7$    |
| <b>LnF<sub>4</sub></b> | $5.22 \times 10^{-2}$   | $5.22 \times 10^{-2}$ | 7.84                 | $1.03 \times 10^{-5}$ | $3.00 \times 10^{-3}$   | $3.00 \times 10^{-3}$  | 17.85                | $7.09 \times 10^{-3}$ |
| <b>LnF<sub>5</sub></b> | $3.11 \times 10^{-6}$   | $3.11 \times 10^{-6}$ | 7.95                 | 2936                  | $7.52 \times 10^{-11}$  | $9.02 \times 10^{-11}$ | 17.90                | $9.27 \times 10^{12}$ |
| <b>LnF<sub>6</sub></b> | 0.918                   | 0.918                 | 7.66                 | $3.29 \times 10^{-8}$ | $1.85 \times 10^{-6}$   | $2.39 \times 10^{-6}$  | 17.83                | $1.39 \times 10^4$    |

Table S23. The comparison of the anisotropy and  $\tau_{QTM}$  between Yb<sub>basis</sub> and Er<sub>basis</sub> structures with exchange in basis sets.

|                        | <b>Yb<sub>basis</sub></b> |                       |                      |                       | <b>Er<sub>basis</sub></b> |                        |                      |                       |
|------------------------|---------------------------|-----------------------|----------------------|-----------------------|---------------------------|------------------------|----------------------|-----------------------|
|                        | <i>g</i> -tensor values   |                       |                      | QTM                   | <i>g</i> -tensor values   |                        |                      | QTM                   |
|                        | <i>g<sub>x</sub></i>      | <i>g<sub>y</sub></i>  | <i>g<sub>z</sub></i> | (s)                   | <i>g<sub>x</sub></i>      | <i>g<sub>y</sub></i>   | <i>g<sub>z</sub></i> | (s)                   |
| <b>LnF<sub>3</sub></b> | 0.188                     | 0.188                 | 7.96                 | $8.09 \times 10^{-7}$ | $5.85 \times 10^{-8}$     | $5.97 \times 10^{-8}$  | 17.91                | $1.83 \times 10^7$    |
| <b>LnF<sub>4</sub></b> | $2.33 \times 10^{-2}$     | $2.33 \times 10^{-2}$ | 7.90                 | $5.19 \times 10^{-5}$ | $1.87 \times 10^{-2}$     | $1.87 \times 10^{-2}$  | 17.74                | $1.82 \times 10^{-4}$ |
| <b>LnF<sub>5</sub></b> | $1.04 \times 10^{-6}$     | $1.04 \times 10^{-6}$ | 7.95                 | $2.64 \times 10^4$    | $4.37 \times 10^{-10}$    | $7.41 \times 10^{-10}$ | 17.90                | $1.73 \times 10^{11}$ |
| <b>LnF<sub>6</sub></b> | 0.764                     | 0.764                 | 7.75                 | $4.79 \times 10^{-8}$ | $1.90 \times 10^{-6}$     | $2.20 \times 10^{-6}$  | 17.76                | $1.51 \times 10^4$    |

## Bond length swap

Table S24. Crystal field properties resulted from CASSCF-SO calculations for an YbF<sub>3</sub> molecule in *D*<sub>3h</sub> point group symmetry using the bond lengths of Er(III)-F.

| Crystal field              |            | <i>g</i> -tensor values |                         |                       | Angle | Wavefunction                    |
|----------------------------|------------|-------------------------|-------------------------|-----------------------|-------|---------------------------------|
| Energy (cm <sup>-1</sup> ) | Energy (K) | <i>g</i> <sub>x</sub>   | <i>g</i> <sub>y</sub>   | <i>g</i> <sub>z</sub> | (°)   | decomposition                   |
| 0                          | 0          | 0.207                   | 0.207                   | 7.96                  | --    | 99.9%  ± 7/2);<br>0.1%   ∓ 5/2) |
| 979                        | 1409       | 0.199                   | 0.199                   | 5.63                  | 0     | 99.9%  ± 5/2);<br>0.1%   ∓ 7/2) |
| 1451                       | 2088       | 3.30 × 10 <sup>-6</sup> | 1.38 × 10 <sup>-5</sup> | 3.39                  | 0     | 100%  ± 3/2)                    |
| 1703                       | 2450       | 4.55                    | 4.55                    | 1.12                  | 0     | 100%  ± 1/2)                    |

Table S25. Crystal field properties resulted from CASSCF-SO calculations for an ErF<sub>3</sub> molecule in *D*<sub>3h</sub> point group symmetry using the bond lengths of Yb(III)-F.

| Crystal field              |            | <i>g</i> -tensor values |                         |                       | Angle | Wavefunction                                        |
|----------------------------|------------|-------------------------|-------------------------|-----------------------|-------|-----------------------------------------------------|
| Energy (cm <sup>-1</sup> ) | Energy (K) | <i>g</i> <sub>x</sub>   | <i>g</i> <sub>y</sub>   | <i>g</i> <sub>z</sub> | (°)   | decomposition                                       |
| 0                          | 0          | 2.33 × 10 <sup>-8</sup> | 3.83 × 10 <sup>-8</sup> | 17.91                 | --    | 100%  ± 15/2)                                       |
| 185                        | 266        | 2.57 × 10 <sup>-1</sup> | 2.57 × 10 <sup>-1</sup> | 15.46                 | 0     | 99.8%  ± 13/2);<br>0.2%   ± 1/2)                    |
| 260                        | 374        | 2.25 × 10 <sup>-1</sup> | 2.25 × 10 <sup>-1</sup> | 13.02                 | 0     | 99.4%  ± 11/2);<br>0.6%   ∓ 1/2)                    |
| 329                        | 474        | 3.17 × 10 <sup>-6</sup> | 4.37 × 10 <sup>-6</sup> | 10.45                 | 0     | 98.1%  ± 9/2);<br>1.9%   ∓ 3/2)                     |
| 418                        | 601        | 5.86                    | 5.86                    | 6.56                  | 0     | 87.6%  ± 7/2);<br>12.4%   ∓ 5/2)                    |
| 575                        | 827        | 5.85                    | 5.85                    | 4.16                  | 0     | 87.6%  ± 5/2);<br>12.4%   ∓ 7/2)                    |
| 668                        | 961        | 1.76 × 10 <sup>-5</sup> | 2.71 × 10 <sup>-5</sup> | 3.27                  | 0     | 98.1%  ± 3/2);<br>1.9%   ∓ 9/2)                     |
| 727                        | 1046       | 9.52                    | 9.52                    | 1.12                  | 0     | 99.2%  ± 1/2);<br>0.6%   ∓ 11/2);<br>0.2%   ± 13/2) |

Table S26. Crystal field properties resulted from CASSCF-SO calculations for an  $\text{YbF}_4$  molecule in  $D_{4h}$  point group symmetry using the bond lengths of Er(III)-F.

| Crystal field               |            | g-tensor values       |                       |       | Angle        | Wavefunction                                             |
|-----------------------------|------------|-----------------------|-----------------------|-------|--------------|----------------------------------------------------------|
| Energy ( $\text{cm}^{-1}$ ) | Energy (K) | $g_x$                 | $g_y$                 | $g_z$ | ( $^\circ$ ) | decomposition                                            |
| 0                           | 0          | $2.66 \times 10^{-2}$ | $2.66 \times 10^{-2}$ | 7.90  | --           | $99.4\%   \pm 7/2 \rangle;$<br>$0.6\%   \mp 1/2 \rangle$ |
| 1316                        | 1893       | 1.96                  | 1.96                  | 5.01  | 0            | $93.3\%   \pm 5/2 \rangle;$<br>$6.7\%   \mp 3/2 \rangle$ |
| 2051                        | 2951       | 1.98                  | 1.98                  | 2.78  | 0            | $93.3\%   \pm 3/2 \rangle;$<br>$6.7\%   \mp 5/2 \rangle$ |
| 2366                        | 3404       | 4.52                  | 4.52                  | 1.05  | 0            | $99.4\%   \pm 1/2 \rangle;$<br>$0.6\%   \mp 7/2 \rangle$ |

Table S27. Crystal field properties resulted from CASSCF-SO calculations for an ErF<sub>4</sub> molecule in *D*<sub>4h</sub> point group symmetry using the bond lengths of Yb(III)-F.

| Crystal field              |            | <i>g</i> -tensor values |                         |                       | Angle | Wavefunction decomposition                                              |
|----------------------------|------------|-------------------------|-------------------------|-----------------------|-------|-------------------------------------------------------------------------|
| Energy (cm <sup>-1</sup> ) | Energy (K) | <i>g</i> <sub>x</sub>   | <i>g</i> <sub>y</sub>   | <i>g</i> <sub>z</sub> | (°)   |                                                                         |
| 0                          | 0          | 1.15 × 10 <sup>-2</sup> | 1.15 × 10 <sup>-2</sup> | 17.79                 | --    | 98.8%   ± 15/2>;<br>1.2%   ± 7/2>                                       |
| 285                        | 410        | 2.56 × 10 <sup>-2</sup> | 2.56 × 10 <sup>-2</sup> | 15.33                 | 0     | 98.7%   ± 13/2>;<br>1.1%   ± 5/2>;<br>0.2%   ∓ 3/2>                     |
| 384                        | 552        | 0.210                   | 0.210                   | 13.05                 | 0     | 99.5%   ± 11/2>;<br>0.3%   ± 3/2>;<br>0.1%   ∓ 5/2>                     |
| 439                        | 631        | 5.05                    | 5.05                    | 8.44                  | 0     | 84.1%   ± 9/2>;<br>8.5%   ∓ 7/2>;<br>7.2%   ± 1/2>;<br>0.2%   ∓ 15/2>   |
| 552                        | 795        | 4.58                    | 4.58                    | 5.22                  | 0     | 78.2%   ± 7/2>;<br>13.4%   ∓ 9/2>;<br>7.4%   ∓ 1/2>;<br>1.0%   ± 15/2>; |
| 605                        | 871        | 8.63                    | 8.63                    | 2.72                  | 0     | 64.3%   ± 5/2>;<br>34.1%   ∓ 3/2>;<br>1.2%   ± 13/2>;<br>0.4%   ∓ 11/2> |
| 1121                       | 1613       | 8.79                    | 8.79                    | 0.255                 | 0     | 65.4%   ± 3/2>;<br>34.5%   ∓ 5/2>;<br>0.1%   ∓ 13/2>                    |
| 1131                       | 1627       | 9.06                    | 9.06                    | 0.256                 | 0     | 85.3%   ± 1/2>;<br>12.1%   ∓ 7/2>;<br>2.5%   ± 13/2>                    |

Table S28. Crystal field properties resulted from CASSCF-SO calculations for an YbF<sub>5</sub> molecule in *D*<sub>5h</sub> point group symmetry using the bond lengths of Er(III)-F.

| Crystal field              |            | <i>g</i> -tensor values |                         |                       | Angle | Wavefunction decomposition |
|----------------------------|------------|-------------------------|-------------------------|-----------------------|-------|----------------------------|
| Energy (cm <sup>-1</sup> ) | Energy (K) | <i>g</i> <sub>x</sub>   | <i>g</i> <sub>y</sub>   | <i>g</i> <sub>z</sub> | (°)   |                            |
| 0                          | 0          | 2.62 × 10 <sup>-6</sup> | 2.62 × 10 <sup>-6</sup> | 7.96                  | --    | 100%  ± 7/2⟩               |
| 1554                       | 2236       | 1.52 × 10 <sup>-6</sup> | 6.47 × 10 <sup>-6</sup> | 5.59                  | 0     | 100%  ± 5/2⟩               |
| 2329                       | 3351       | 1.55 × 10 <sup>-6</sup> | 6.33 × 10 <sup>-6</sup> | 3.37                  | 0     | 100%  ± 3/2⟩               |
| 2748                       | 3954       | 4.54                    | 4.54                    | 1.11                  | 0     | 100%  ± 1/2⟩               |

Table S29. Crystal field properties resulted from CASSCF-SO calculations for an ErF<sub>5</sub> molecule in *D*<sub>5h</sub> point group symmetry using the bond lengths of Yb(III)-F.

| Crystal field              |            | <i>g</i> -tensor values |                         |                       | Angle | Wavefunction decomposition |
|----------------------------|------------|-------------------------|-------------------------|-----------------------|-------|----------------------------|
| Energy (cm <sup>-1</sup> ) | Energy (K) | <i>g</i> <sub>x</sub>   | <i>g</i> <sub>y</sub>   | <i>g</i> <sub>z</sub> | (°)   |                            |
| 0                          | 0          | 2.26 × 10 <sup>-9</sup> | 2.41 × 10 <sup>-9</sup> | 17.89                 | --    | 100%  ± 15/2⟩              |
| 339                        | 487        | 5.33 × 10 <sup>-9</sup> | 6.59 × 10 <sup>-9</sup> | 15.46                 | 0     | 100%  ± 13/2⟩              |
| 459                        | 661        | 2.00 × 10 <sup>-2</sup> | 2.00 × 10 <sup>-2</sup> | 13.10                 | 0     | 100%  ± 11/2⟩              |
| 563                        | 810        | 1.99 × 10 <sup>-2</sup> | 1.99 × 10 <sup>-2</sup> | 10.70                 | 0     | 100%  ± 9/2⟩               |
| 718                        | 1033       | 2.94 × 10 <sup>-5</sup> | 3.45 × 10 <sup>-5</sup> | 8.28                  | 0     | 100%  ± 7/2⟩               |
| 907                        | 1305       | 3.30 × 10 <sup>-5</sup> | 9.68 × 10 <sup>-5</sup> | 5.87                  | 0     | 100%  ± 5/2⟩               |
| 1081                       | 1556       | 5.99 × 10 <sup>-5</sup> | 6.98 × 10 <sup>-5</sup> | 3.50                  | 0     | 100%  ± 3/2⟩               |
| 1186                       | 1706       | 9.53                    | 9.53                    | 1.16                  | 0     | 100%  ± 1/2⟩               |

Table S30. Crystal field properties resulted from CASSCF-SO calculations for an YbF<sub>6</sub> molecule in  $D_{6h}$  point group symmetry using the bond lengths of Er(III)-F.

| Crystal field              |            | g-tensor values       |                       |       | Angle | Wavefunction                               |
|----------------------------|------------|-----------------------|-----------------------|-------|-------|--------------------------------------------|
| Energy (cm <sup>-1</sup> ) | Energy (K) | $g_x$                 | $g_y$                 | $g_z$ | (°)   | decomposition                              |
| 0                          | 0          | 0.774                 | 0.774                 | 7.75  | --    | 98.7%   $\pm 7/2$ );<br>1.3%   $\mp 5/2$ ) |
| 1918                       | 2760       | 0.728                 | 0.728                 | 5.39  | 0     | 98.7%   $\pm 5/2$ );<br>1.3%   $\mp 7/2$ ) |
| 2828                       | 4069       | $4.01 \times 10^{-6}$ | $5.23 \times 10^{-6}$ | 3.36  | 0     | 100%   $\pm 3/2$ )                         |
| 3315                       | 4770       | 4.54                  | 4.54                  | 1.10  | 0     | 100%   $\pm 1/2$ )                         |

Table S31. Crystal field properties resulted from CASSCF-SO calculations for an ErF<sub>6</sub> molecule in  $D_{6h}$  point group symmetry using the bond lengths of Yb(III)-F.

| Crystal field              |            | g-tensor values       |                       |       | Angle | Wavefunction                                                         |
|----------------------------|------------|-----------------------|-----------------------|-------|-------|----------------------------------------------------------------------|
| Energy (cm <sup>-1</sup> ) | Energy (K) | $g_x$                 | $g_y$                 | $g_z$ | (°)   | decomposition                                                        |
| 0                          | 0          | $1.29 \times 10^{-6}$ | $3.74 \times 10^{-6}$ | 17.76 | --    | 99.3%   $\pm 15/2$ );<br>0.6%   $\pm 3/2$ );<br>0.1%   $\mp 9/2$ )   |
| 347                        | 499        | 4.14                  | 4.14                  | 11.96 | 0     | 85.0%   $\pm 13/2$ );<br>5.5%   $\pm 1/2$ );<br>9.4%   $\mp 11/2$ )  |
| 476                        | 686        | 3.75                  | 3.75                  | 8.89  | 90    | 83.3%   $\mp 11/2$ );<br>4.0%   $\pm 1/2$ );<br>12.6%   $\pm 11/2$ ) |
| 512                        | 737        | $1.20 \times 10^{-4}$ | $1.62 \times 10^{-4}$ | 8.17  | 0     | 82.8%   $\mp 9/2$ );<br>16.8%   $\pm 3/2$ );<br>0.4%   $\pm 15/2$ )  |
| 558                        | 802        | 8.59                  | 8.59                  | 3.09  | 0     | 63.5%   $\pm 7/2$ );<br>36.5%   $\mp 5/2$ )                          |
| 1412                       | 2031       | 8.53                  | 8.53                  | 0.696 | 0     | 63.5%   $\mp 5/2$ );<br>36.5%   $\pm 7/2$ )                          |
| 1478                       | 2127       | $1.22 \times 10^{-4}$ | $3.56 \times 10^{-4}$ | 1.11  | 0     | 82.6%   $\pm 3/2$ );<br>17.1%   $\mp 9/2$ );<br>0.3%   $\pm 15/2$ ); |
| 1541                       | 2218       | 9.13                  | 9.13                  | 0.460 | 0     | 90.4%   $\pm 1/2$ );<br>7.2%   $\mp 11/2$ );<br>2.3%   $\pm 13/2$ )  |

## Optimised orbital exchange

Table S32. Crystal field properties resulted from CASSCF-SO calculations for an  $\text{YbF}_3$  molecule in  $D_{3h}$  point group symmetry using the optimised orbital definitions of Er(III)-F.

| Crystal field               |            | g-tensor values       |                       |       | Angle        | Wavefunction                             |
|-----------------------------|------------|-----------------------|-----------------------|-------|--------------|------------------------------------------|
| Energy ( $\text{cm}^{-1}$ ) | Energy (K) | $g_x$                 | $g_y$                 | $g_z$ | ( $^\circ$ ) | decomposition                            |
| 0                           | 0          | 0.379                 | 0.379                 | 7.92  | --           | 99.7%  $\pm 7/2$ );<br>0.3%  $\mp 5/2$ ) |
| 876                         | 1260       | 0.363                 | 0.363                 | 5.60  | 0            | 99.7%  $\pm 5/2$ );<br>0.3%  $\mp 7/2$ ) |
| 1219                        | 1753       | $4.67 \times 10^{-6}$ | $2.38 \times 10^{-5}$ | 3.40  | 0            | 100%  $\pm 3/2$ )                        |
| 1421                        | 2044       | 4.55                  | 4.55                  | 1.12  | 0            | 100%  $\pm 1/2$ )                        |

Table S33. Crystal field properties resulted from CASSCF-SO calculations for an ErF<sub>3</sub> molecule in *D*<sub>3h</sub> point group symmetry using the optimised orbital definitions of Yb(III)-F.

| Crystal field              |            | <i>g</i> -tensor values |                         |                       | Angle | Wavefunction decomposition                         |
|----------------------------|------------|-------------------------|-------------------------|-----------------------|-------|----------------------------------------------------|
| Energy (cm <sup>-1</sup> ) | Energy (K) | <i>g</i> <sub>x</sub>   | <i>g</i> <sub>y</sub>   | <i>g</i> <sub>z</sub> | (°)   |                                                    |
| 0                          | 0          | 2.24 × 10 <sup>-8</sup> | 4.34 × 10 <sup>-8</sup> | 17.91                 | --    | 100%  ± 15/2⟩                                      |
| 226                        | 325        | 0.109                   | 0.109                   | 15.48                 | 0     | 99.9%  ± 13/2⟩;<br>0.1%   ± 1/2⟩                   |
| 342                        | 492        | 8.98 × 10 <sup>-2</sup> | 8.98 × 10 <sup>-2</sup> | 13.06                 | 0     | 99.6%  ± 11/2⟩;<br>0.4%   ∓ 1/2⟩                   |
| 442                        | 636        | 4.26 × 10 <sup>-6</sup> | 1.04 × 10 <sup>-5</sup> | 10.54                 | 0     | 98.8%  ± 9/2⟩;<br>1.2%   ∓ 3/2⟩                    |
| 551                        | 793        | 5.17                    | 5.17                    | 6.99                  | 0     | 90.9%  ± 7/2⟩;<br>9.1%   ∓ 5/2⟩                    |
| 707                        | 1017       | 5.16                    | 5.16                    | 4.59                  | 0     | 90.9%  ± 5/2⟩;<br>9.1%   ∓ 7/2⟩                    |
| 805                        | 1159       | 9.45 × 10 <sup>-6</sup> | 1.43 × 10 <sup>-4</sup> | 3.36                  | 0     | 98.8%  ± 3/2⟩;<br>1.2%   ∓ 9/2⟩                    |
| 866                        | 1246       | 9.53                    | 9.53                    | 1.14                  | 0     | 99.5%  ± 1/2⟩;<br>0.4%   ∓ 11/2⟩;<br>0.1%  ± 13/2⟩ |

Table S34. Crystal field properties resulted from CASSCF-SO calculations for an YbF<sub>4</sub> molecule in *D*<sub>4h</sub> point group symmetry using the optimised orbital definitions of Er(III)-F.

| Crystal field              |            | <i>g</i> -tensor values |                         |                       | Angle | Wavefunction                      |
|----------------------------|------------|-------------------------|-------------------------|-----------------------|-------|-----------------------------------|
| Energy (cm <sup>-1</sup> ) | Energy (K) | <i>g</i> <sub>x</sub>   | <i>g</i> <sub>y</sub>   | <i>g</i> <sub>z</sub> | (°)   | decomposition                     |
| 0                          | 0          | 5.22 × 10 <sup>-2</sup> | 5.22 × 10 <sup>-2</sup> | 7.84                  | --    | 98.8%   ± 7/2);<br>1.2%   ∓ 1/2)  |
| 1111                       | 1599       | 2.63                    | 2.63                    | 4.47                  | 0     | 87.2%   ± 5/2);<br>12.8%   ∓ 3/2) |
| 1726                       | 2484       | 2.23                    | 2.65                    | 2.65                  | 0     | 87.2%   ± 3/2);<br>12.8%   ∓ 5/2) |
| 1941                       | 2793       | 4.50                    | 4.50                    | 1.00                  | 0     | 98.8%   ± 1/2);<br>1.2%   ∓ 7/2)  |

Table S35. Crystal field properties resulted from CASSCF-SO calculations for an ErF<sub>4</sub> molecule in *D*<sub>4h</sub> point group symmetry using the optimised orbital definitions of Yb(III)-F.

| Crystal field              |            | <i>g</i> -tensor values |                         |                       | Angle | Wavefunction                                                            |
|----------------------------|------------|-------------------------|-------------------------|-----------------------|-------|-------------------------------------------------------------------------|
| Energy (cm <sup>-1</sup> ) | Energy (K) | <i>g</i> <sub>x</sub>   | <i>g</i> <sub>y</sub>   | <i>g</i> <sub>z</sub> | (°)   | decomposition                                                           |
| 0                          | 0          | 3.00 × 10 <sup>-3</sup> | 3.00 × 10 <sup>-3</sup> | 17.85                 | --    | 99.4%   ± 15/2);<br>0.6%   ± 7/2)                                       |
| 327                        | 470        | 5.60 × 10 <sup>-3</sup> | 5.60 × 10 <sup>-3</sup> | 15.42                 | 0     | 99.5%   ± 13/2);<br>0.5%   ± 5/2)                                       |
| 475                        | 683        | 6.97 × 10 <sup>-2</sup> | 6.97 × 10 <sup>-2</sup> | 13.08                 | 0     | 99.8%   ± 11/2);<br>0.2%   ± 3/2)                                       |
| 577                        | 831        | 3.53                    | 3.53                    | 9.54                  | 0     | 91.3%   ± 9/2);<br>4.7%   ± 1/2);<br>4.0%   ∓ 7/2)                      |
| 707                        | 1017       | 3.11                    | 3.11                    | 6.38                  | 0     | 84.9%   ± 7/2);<br>7.9%   ∓ 1/2);<br>6.7%   ∓ 9/2);<br>0.5%   ± 15/2)   |
| 783                        | 1127       | 2.81                    | 8.65                    | 8.65                  | 90    | 66.5%   ± 5/2);<br>32.8%   ∓ 3/2);<br>0.5%   ± 13/2);<br>0.2%   ∓ 11/2) |
| 1247                       | 1794       | 0.405                   | 8.70                    | 8.70                  | 90    | 67%   ± 3/2);<br>32.9%   ∓ 5/2);<br>0.1%   ∓ 13/2)                      |
| 1262                       | 1815       | 0.369                   | 9.12                    | 9.12                  | 90    | 87.5%   ± 1/2);<br>10.5%   ∓ 7/2);<br>2.0%   ± 9/2)                     |

Table S36. Crystal field properties resulted from CASSCF-SO calculations for an YbF<sub>5</sub> molecule in *D*<sub>5h</sub> point group symmetry using the optimised orbital definitions of Er(III)-F.

| Crystal field              |            | g-tensor values         |                         |                | Angle | Wavefunction  |
|----------------------------|------------|-------------------------|-------------------------|----------------|-------|---------------|
| Energy (cm <sup>-1</sup> ) | Energy (K) | g <sub>x</sub>          | g <sub>y</sub>          | g <sub>z</sub> | (°)   | decomposition |
| 0                          | 0          | 3.11 × 10 <sup>-6</sup> | 3.11 × 10 <sup>-6</sup> | 7.95           | --    | 100%  ± 7/2⟩  |
| 1351                       | 1944       | 3.63 × 10 <sup>-6</sup> | 9.48 × 10 <sup>-6</sup> | 5.61           | 0     | 100%  ± 5/2⟩  |
| 1928                       | 2774       | 7.85 × 10 <sup>-7</sup> | 1.21 × 10 <sup>-5</sup> | 3.39           | 0     | 100%  ± 3/2⟩  |
| 2257                       | 3248       | 4.54                    | 4.54                    | 1.11           | 0     | 100%  ± 1/2⟩  |

Table S37. Crystal field properties resulted from CASSCF-SO calculations for an ErF<sub>5</sub> molecule in *D*<sub>5h</sub> point group symmetry using the optimised orbital definitions of Yb(III)-F.

| Crystal field              |            | g-tensor values          |                          |                | Angle | Wavefunction  |
|----------------------------|------------|--------------------------|--------------------------|----------------|-------|---------------|
| Energy (cm <sup>-1</sup> ) | Energy (K) | g <sub>x</sub>           | g <sub>y</sub>           | g <sub>z</sub> | (°)   | decomposition |
| 0                          | 0          | 7.52 × 10 <sup>-11</sup> | 9.02 × 10 <sup>-11</sup> | 17.90          | --    | 100%  ± 15/2⟩ |
| 382                        | 549        | 5.06 × 10 <sup>-9</sup>  | 5.34 × 10 <sup>-9</sup>  | 15.46          | 0     | 100%  ± 13/2⟩ |
| 554                        | 797        | 1.10 × 10 <sup>-3</sup>  | 1.10 × 10 <sup>-3</sup>  | 13.09          | 0     | 100%  ± 11/2⟩ |
| 698                        | 1004       | 1.10 × 10 <sup>-3</sup>  | 1.10 × 10 <sup>-3</sup>  | 10.69          | 0     | 100%  ± 9/2⟩  |
| 875                        | 1259       | 5.82 × 10 <sup>-5</sup>  | 5.93 × 10 <sup>-5</sup>  | 8.28           | 0     | 100%  ± 7/2⟩  |
| 1073                       | 1543       | 5.09 × 10 <sup>-5</sup>  | 6.64 × 10 <sup>-5</sup>  | 5.87           | 0     | 100%  ± 5/2⟩  |
| 1247                       | 1794       | 2.51 × 10 <sup>-5</sup>  | 4.06 × 10 <sup>-5</sup>  | 3.50           | 0     | 100%  ± 3/2⟩  |
| 1349                       | 1941       | 9.54                     | 9.54                     | 1.16           | 0     | 100%  ± 1/2⟩  |

Table S38. Crystal field properties resulted from CASSCF-SO calculations for an  $\text{YbF}_6$  molecule in  $D_{6h}$  point group symmetry using the optimised orbital definitions of  $\text{Er(III)-F}$ .

| Crystal field               |            | g-tensor values       |                       |       | Angle        | Wavefunction                                              |
|-----------------------------|------------|-----------------------|-----------------------|-------|--------------|-----------------------------------------------------------|
| Energy ( $\text{cm}^{-1}$ ) | Energy (K) | $g_x$                 | $g_y$                 | $g_z$ | ( $^\circ$ ) | decomposition                                             |
| 0                           | 0          | 0.918                 | 0.918                 | 7.66  | --           | $98.1\%   \pm 7/2 \rangle$ ;<br>$1.9\%   \mp 5/2 \rangle$ |
| 1691                        | 2433       | 0.864                 | 0.864                 | 5.33  | 0            | $98.1\%   \pm 5/2 \rangle$ ;<br>$1.9\%   \mp 7/2 \rangle$ |
| 2367                        | 3406       | $9.15 \times 10^{-7}$ | $1.01 \times 10^{-5}$ | 3.38  | 0            | $100\%   \pm 3/2 \rangle$                                 |
| 2756                        | 3966       | 4.54                  | 4.54                  | 1.10  | 0            | $100\%   \pm 1/2 \rangle$                                 |

Table S39. Crystal field properties resulted from CASSCF-SO calculations for an ErF<sub>6</sub> molecule in *D*<sub>6h</sub> point group symmetry using the optimised orbital definitions of Yb(III)-F.

| Crystal field              |            | <i>g</i> -tensor values |                         |                       | Angle | Wavefunction decomposition                            |
|----------------------------|------------|-------------------------|-------------------------|-----------------------|-------|-------------------------------------------------------|
| Energy (cm <sup>-1</sup> ) | Energy (K) | <i>g</i> <sub>x</sub>   | <i>g</i> <sub>y</sub>   | <i>g</i> <sub>z</sub> | (°)   |                                                       |
| 0                          | 0          | 1.85 × 10 <sup>-6</sup> | 2.39 × 10 <sup>-6</sup> | 17.83                 | --    | 99.7%   ± 15/2);<br>0.3%   ± 3/2);                    |
| 407                        | 586        | 2.32                    | 2.32                    | 14.25                 | 0     | 94.6%   ± 13/2);<br>2.7%   ∓ 11/2);<br>2.9%   ± 1/2)  |
| 579                        | 834        | 2.02                    | 2.02                    | 11.31                 | 0     | 91.7%   ± 11/2);<br>4.0%   ∓ 13/2);<br>4.4%   ∓ 1/2)  |
| 672                        | 967        | 8.59 × 10 <sup>-5</sup> | 1.13 × 10 <sup>-4</sup> | 8.57                  | 0     | 85.4%   ± 9/2);<br>14.5%   ∓ 3/2);<br>0.15%   ∓ 15/2) |
| 747                        | 1075       | 8.50                    | 8.50                    | 3.33                  | 0     | 65.4%   ± 7/2);<br>34.6%   ∓ 5/2)                     |
| 1512                       | 2175       | 8.45                    | 8.45                    | 0.935                 | 0     | 65.4%   ± 5/2);<br>34.6%   ∓ 7/2)                     |
| 1585                       | 2281       | 2.67 × 10 <sup>-5</sup> | 5.59 × 10 <sup>-5</sup> | 1.46                  | 0     | 85.2%   ± 3/2);<br>14.6%   ∓ 9/2);<br>0.2%   ± 15/2)  |
| 1651                       | 2375       | 9.22                    | 9.22                    | 0.596                 | 0     | 92.7%   ± 1/2);<br>5.6%   ∓ 11/2);<br>1.7%   ± 13/2)  |

## Basis set exchange

Table S40. Crystal field properties resulted from CASSCF-SO calculations for an YbF<sub>3</sub> molecule in *D*<sub>3h</sub> point group symmetry using the basis set of Er(III).

| Crystal field              |            | g-tensor values         |                         |                | Angle | Wavefunction decomposition     |
|----------------------------|------------|-------------------------|-------------------------|----------------|-------|--------------------------------|
| Energy (cm <sup>-1</sup> ) | Energy (K) | g <sub>x</sub>          | g <sub>y</sub>          | g <sub>z</sub> | (°)   |                                |
| 0                          | 0          | 0.188                   | 0.188                   | 7.96           | --    | 99.9%  ± 7/2>;<br>0.1%  ∓ 5/2> |
| 999                        | 1438       | 0.180                   | 0.180                   | 5.63           | 0     | 99.9%  ± 5/2>;<br>0.1%  ∓ 7/2> |
| 1491                       | 2146       | 3.66 × 10 <sup>-6</sup> | 4.01 × 10 <sup>-6</sup> | 3.39           | 0     | 100%  ± 3/2>                   |
| 1756                       | 2527       | 4.56                    | 4.55                    | 1.12           | 0     | 100%  ± 1/2>                   |

Table S41. Crystal field properties resulted from CASSCF-SO calculations for an ErF<sub>3</sub> molecule in *D*<sub>3h</sub> point group symmetry using the basis set of Yb(III).

| Crystal field              |            | <i>g</i> -tensor values |                         |                       | Angle | Wavefunction decomposition                           |
|----------------------------|------------|-------------------------|-------------------------|-----------------------|-------|------------------------------------------------------|
| Energy (cm <sup>-1</sup> ) | Energy (K) | <i>g</i> <sub>x</sub>   | <i>g</i> <sub>y</sub>   | <i>g</i> <sub>z</sub> | (°)   |                                                      |
| 0                          | 0          | 5.85 × 10 <sup>-8</sup> | 5.97 × 10 <sup>-8</sup> | 17.91                 | --    | 99.9%   ± 15/2>;<br>0.1%   ± 3/2>                    |
| 177                        | 255        | 0.535                   | 0.535                   | 15.41                 | 0     | 99.4%   ± 13/2>;<br>0.4%   ± 1/2>;<br>0.2%   ∓ 11/2> |
| 236                        | 340        | 0.481                   | 0.481                   | 12.93                 | 0     | 98.9%   ± 11/2>;<br>0.9%   ∓ 1/2>;<br>0.2%   ∓ 13/2> |
| 289                        | 416        | 7.80 × 10 <sup>-6</sup> | 1.75 × 10 <sup>-5</sup> | 10.30                 | 0     | 97.0%   ± 9/2>;<br>3.0%   ∓ 3/2>                     |
| 362                        | 521        | 6.62                    | 6.62                    | 5.96                  | 0     | 83.4%   ± 7/2>;<br>16.6%   ∓ 5/2>                    |
| 532                        | 766        | 6.61                    | 6.61                    | 3.56                  | 0     | 83.4%   ± 5/2>;<br>16.6%   ∓ 7/2>                    |
| 619                        | 890        | 3.50 × 10 <sup>-5</sup> | 1.60 × 10 <sup>-4</sup> | 3.11                  | 0     | 97.0%   ± 3/2>;<br>3.0%   ∓ 9/2>                     |
| 677                        | 974        | 9.50                    | 9.50                    | 1.08                  | 0     | 98.7%   ± 1/2>;<br>1%   ∓ 11/2>;<br>0.3%   ± 13/2>   |

Table S42. Crystal field properties resulted from CASSCF-SO calculations for an  $\text{YbF}_4$  molecule in  $D_{4h}$  point group symmetry using the basis set of  $\text{Er(III)}$ .

| Crystal field               |            | g-tensor values       |                       |       | Angle        | Wavefunction                                             |
|-----------------------------|------------|-----------------------|-----------------------|-------|--------------|----------------------------------------------------------|
| Energy ( $\text{cm}^{-1}$ ) | Energy (K) | $g_x$                 | $g_y$                 | $g_z$ | ( $^\circ$ ) | decomposition                                            |
| 0                           | 0          | $2.33 \times 10^{-2}$ | $2.33 \times 10^{-2}$ | 7.90  | --           | $99.4\%   \pm 7/2 \rangle;$<br>$0.6\%   \mp 1/2 \rangle$ |
| 1372                        | 1973       | 1.81                  | 1.81                  | 5.10  | 0            | $94.3\%   \pm 5/2 \rangle;$<br>$5.7\%   \mp 3/2 \rangle$ |
| 2140                        | 3079       | 1.84                  | 1.84                  | 2.87  | 0            | $94.3\%   \pm 3/2 \rangle;$<br>$5.7\%   \mp 5/2 \rangle$ |
| 2486                        | 3576       | 4.52                  | 4.52                  | 1.06  | 0            | $99.4\%   \pm 1/2 \rangle;$<br>$0.6\%   \mp 7/2 \rangle$ |

Table S43. Crystal field properties resulted from CASSCF-SO calculations for an ErF<sub>4</sub> molecule in *D*<sub>4h</sub> point group symmetry using the basis set of Yb(III).

| Crystal field              |            | <i>g</i> -tensor values |                         |                       | Angle | Wavefunction decomposition                                               |
|----------------------------|------------|-------------------------|-------------------------|-----------------------|-------|--------------------------------------------------------------------------|
| Energy (cm <sup>-1</sup> ) | Energy (K) | <i>g</i> <sub>x</sub>   | <i>g</i> <sub>y</sub>   | <i>g</i> <sub>z</sub> | (°)   |                                                                          |
| 0                          | 0          | 1.87 × 10 <sup>-2</sup> | 1.87 × 10 <sup>-2</sup> | 17.74                 | --    | 98.3%   ± 15/2);<br>1.6%   ± 7/2);<br>0.1%   ∓ 1/2)                      |
| 265                        | 382        | 7.66 × 10 <sup>-3</sup> | 7.66 × 10 <sup>-3</sup> | 15.22                 | 0     | 97.6%   ± 13/2);<br>2%   ± 5/2);<br>0.3%   ∓ 3/2)                        |
| 343                        | 493        | 0.271                   | 0.271                   | 13.06                 | 0     | 99.6%   ± 11/2);<br>0.3%   ± 3/2);<br>0.1%   ∓ 5/2)                      |
| 376                        | 541        | 5.43                    | 5.43                    | 8.07                  | 0     | 82.5%   ± 9/2);<br>9.8%   ∓ 7/2);<br>7.4%   ± 1/2);<br>0.3%   ∓ 15/2)    |
| 477                        | 686        | 4.96                    | 4.96                    | 4.88                  | 0     | 76.6%   ± 7/2);<br>15.0%   ∓ 9/2);<br>7.2%   ∓ 1/2);<br>1.3%   ± 15/2);  |
| 521                        | 749        | 8.54                    | 8.54                    | 2.81                  | 0     | 63.2%   ± 5/2);<br>34.3%   ∓ 3/2);<br>2.2%   ± 13/2);<br>0.3%   ∓ 11/2)  |
| 1013                       | 1457       | 8.80                    | 8.80                    | 0.226                 | 0     | 65.1%   ± 3/2);<br>34.7%   ∓ 5/2);<br>0.1%   ∓ 13/2);<br>0.1%   ± 11/2); |
| 1022                       | 1470       | 9.05                    | 9.05                    | 0.237                 | 0     | 85.3%   ± 1/2);<br>12.2%   ∓ 7/2);<br>2.5%   ± 13/2)                     |

Table S44. Crystal field properties resulted from CASSCF-SO calculations for an YbF<sub>5</sub> molecule in  $D_{5h}$  point group symmetry using the basis set of Er(III).

| Crystal field              |            | g-tensor values       |                       |       | Angle | Wavefunction    |
|----------------------------|------------|-----------------------|-----------------------|-------|-------|-----------------|
| Energy (cm <sup>-1</sup> ) | Energy (K) | $g_x$                 | $g_y$                 | $g_z$ | (°)   | decomposition   |
| 0                          | 0          | $1.04 \times 10^{-6}$ | $1.04 \times 10^{-6}$ | 7.95  | --    | 100%  $\pm 7/2$ |
| 1627                       | 2341       | $2.63 \times 10^{-7}$ | $2.20 \times 10^{-6}$ | 5.59  | 0     | 100%  $\pm 5/2$ |
| 2468                       | 3550       | $5.71 \times 10^{-6}$ | $8.54 \times 10^{-6}$ | 3.36  | 0     | 100%  $\pm 3/2$ |
| 2920                       | 4202       | 4.54                  | 4.54                  | 1.10  | 0     | 100%  $\pm 1/2$ |

Table S45. Crystal field properties resulted from CASSCF-SO calculations for an ErF<sub>5</sub> molecule in  $D_{5h}$  point group symmetry using the basis set of Yb(III).

| Crystal field              |            | g-tensor values        |                        |       | Angle | Wavefunction     |
|----------------------------|------------|------------------------|------------------------|-------|-------|------------------|
| Energy (cm <sup>-1</sup> ) | Energy (K) | $g_x$                  | $g_y$                  | $g_z$ | (°)   | n decomposition  |
| 0                          | 0          | $4.37 \times 10^{-10}$ | $7.41 \times 10^{-10}$ | 17.90 | --    | 100%  $\pm 15/2$ |
| 317                        | 456        | $2.93 \times 10^{-8}$  | $3.13 \times 10^{-8}$  | 15.47 | 0     | 100%  $\pm 13/2$ |
| 411                        | 592        | $1.66 \times 10^{-2}$  | $1.66 \times 10^{-2}$  | 13.11 | 0     | 100%  $\pm 11/2$ |
| 491                        | 707        | $1.66 \times 10^{-2}$  | $1.66 \times 10^{-2}$  | 10.71 | 0     | 100%  $\pm 9/2$  |
| 628                        | 903        | $7.35 \times 10^{-5}$  | $8.94 \times 10^{-5}$  | 8.29  | 0     | 100%  $\pm 7/2$  |
| 806                        | 1159       | $7.09 \times 10^{-5}$  | $9.17 \times 10^{-5}$  | 5.88  | 0     | 100%  $\pm 5/2$  |
| 973                        | 1401       | $9.65 \times 10^{-6}$  | $1.11 \times 10^{-5}$  | 3.50  | 0     | 100%  $\pm 3/2$  |
| 1075                       | 1547       | 9.54                   | 9.54                   | 1.16  | 0     | 100%  $\pm 1/2$  |

Table S46. Crystal field properties resulted from CASSCF-SO calculations for an YbF<sub>6</sub> molecule in  $D_{6h}$  point group symmetry using the basis set of Er(III).

| Crystal field              |            | g-tensor values       |                       |       | Angle | Wavefunction                    |
|----------------------------|------------|-----------------------|-----------------------|-------|-------|---------------------------------|
| Energy (cm <sup>-1</sup> ) | Energy (K) | $g_x$                 | $g_y$                 | $g_z$ | (°)   | decomposition                   |
| 0                          | 0          | 0.764                 | 0.764                 | 7.75  | --    | 98.7%  ± 7/2);<br>1.3%   ∓ 5/2) |
| 2019                       | 2905       | 0.720                 | 0.720                 | 5.38  | 0     | 98.7%  ± 5/2);<br>1.3%   ∓ 7/2) |
| 3016                       | 4339       | $6.37 \times 10^{-6}$ | $8.52 \times 10^{-6}$ | 3.35  | 0     | 100%  ± 3/2)                    |
| 3543                       | 5098       | 4.54                  | 4.54                  | 1.10  | 0     | 100%  ± 1/2)                    |

Table S47. Crystal field properties resulted from CASSCF-SO calculations for an ErF<sub>6</sub> molecule in  $D_{6h}$  point group symmetry using the basis set of Yb(III).

| Crystal field              |            | g-tensor values       |                       |       | Angle | Wavefunction                                        |
|----------------------------|------------|-----------------------|-----------------------|-------|-------|-----------------------------------------------------|
| Energy (cm <sup>-1</sup> ) | Energy (K) | $g_x$                 | $g_y$                 | $g_z$ | (°)   | decomposition                                       |
| 0                          | 0          | $1.90 \times 10^{-6}$ | $2.20 \times 10^{-6}$ | 17.76 | --    | 99.3%  ± 15/2);<br>0.6%  ± 3/2);<br>0.1%  ∓ 9/2)    |
| 320                        | 460        | 4.74                  | 4.74                  | 10.80 | 0     | 80.6%  ± 13/2);<br>13.1%  ∓ 11/2);<br>6.3%  ± 1/2)  |
| 427                        | 614        | 4.35                  | 4.35                  | 7.74  | 0     | 79.6%  ± 11/2);<br>17.0%  ∓ 13/2);<br>3.5%   ∓ 1/2) |
| 441                        | 635        | $1.03 \times 10^{-4}$ | $3.11 \times 10^{-4}$ | 8.20  | 0     | 83.0%  ± 9/2);<br>16.6%   ∓ 7/2);<br>0.4%   ∓ 15/2) |
| 477                        | 686        | 8.58                  | 8.58                  | 3.13  | 0     | 63.7%  ± 7/2);<br>36.3%   ∓ 5/2)                    |
| 1257                       | 1809       | 8.52                  | 8.52                  | 0.73  | 0     | 63.7%  ± 5/2);<br>36.3%   ∓ 7/2)                    |
| 1327                       | 1910       | $8.14 \times 10^{-5}$ | $8.86 \times 10^{-5}$ | 1.14  | 0     | 82.8%  ± 3/2);<br>16.9%   ∓ 9/2);<br>0.3%  ± 15/2)  |
| 1393                       | 2004       | 9.13                  | 9.13                  | 0.47  | 0     | 90.3%  ± 1/2);<br>7.3%   ∓ 11/2);<br>2.4%  ± 13/2)  |

#### 4. Model Hamiltonian Simulations

Table S48. Crystal field parameters from CASSCF calculations on the YbF<sub>x</sub> series with bold parameters indicating truncated point group terms.

| CFP        | YbF <sub>3</sub>                         | YbF <sub>4</sub>                         | YbF <sub>5</sub>                         | YbF <sub>6</sub>                         | YbF <sub>8</sub>                        |
|------------|------------------------------------------|------------------------------------------|------------------------------------------|------------------------------------------|-----------------------------------------|
| $B_2^{-2}$ | $-1.77 \times 10^{-6}$                   | $-3.42 \times 10^{-6}$                   | $4.98 \times 10^{-7}$                    | $2.15 \times 10^{-7}$                    | $-1.21 \times 10^{-6}$                  |
| $B_2^{-1}$ | $-7.54 \times 10^{-8}$                   | $-1.30 \times 10^{-8}$                   | $-8.70 \times 10^{-10}$                  | $9.76 \times 10^{-9}$                    | $2.09 \times 10^{-6}$                   |
| $B_2^0$    | <b>-48.1</b>                             | <b>-66.4</b>                             | <b>-77.9</b>                             | <b>-93.9</b>                             | <b>-28.1</b>                            |
| $B_2^1$    | $-1.32 \times 10^{-9}$                   | $2.83 \times 10^{-8}$                    | $-4.43 \times 10^{-9}$                   | $1.71 \times 10^{-8}$                    | $-2.04 \times 10^{-6}$                  |
| $B_2^2$    | $6.96 \times 10^{-5}$                    | $-3.80 \times 10^{-5}$                   | $-2.12 \times 10^{-6}$                   | $4.26 \times 10^{-5}$                    | $4.40 \times 10^{-5}$                   |
| $B_4^{-4}$ | $1.85 \times 10^{-7}$                    | $2.64 \times 10^{-1}$                    | $3.41 \times 10^{-7}$                    | $3.62 \times 10^{-7}$                    | $1.65 \times 10^{-7}$                   |
| $B_4^{-3}$ | $6.93 \times 10^{-9}$                    | $-4.41 \times 10^{-9}$                   | $1.21 \times 10^{-8}$                    | $-8.48 \times 10^{-9}$                   | $-1.40 \times 10^{-7}$                  |
| $B_4^{-2}$ | $4.55 \times 10^{-8}$                    | $-5.84 \times 10^{-8}$                   | $-3.12 \times 10^{-8}$                   | $3.18 \times 10^{-8}$                    | $2.01 \times 10^{-8}$                   |
| $B_4^{-1}$ | $2.98 \times 10^{-9}$                    | $1.18 \times 10^{-10}$                   | $-7.81 \times 10^{-11}$                  | $-1.04 \times 10^{-10}$                  | $-9.86 \times 10^{-8}$                  |
| $B_4^0$    | <b><math>-1.00 \times 10^{-1}</math></b> | <b><math>-1.44 \times 10^{-1}</math></b> | <b><math>-1.41 \times 10^{-1}</math></b> | <b><math>-1.78 \times 10^{-1}</math></b> | <b><math>1.84 \times 10^{-1}</math></b> |
| $B_4^1$    | $2.90 \times 10^{-10}$                   | $-6.72 \times 10^{-10}$                  | $1.69 \times 10^{-10}$                   | $-1.89 \times 10^{-9}$                   | $9.53 \times 10^{-8}$                   |
| $B_4^2$    | $2.76 \times 10^{-6}$                    | $-2.69 \times 10^{-6}$                   | $1.82 \times 10^{-6}$                    | $5.77 \times 10^{-7}$                    | $2.28 \times 10^{-6}$                   |
| $B_4^3$    | $-1.79 \times 10^{-9}$                   | $-3.41 \times 10^{-9}$                   | $1.40 \times 10^{-8}$                    | $-9.44 \times 10^{-9}$                   | $1.33 \times 10^{-7}$                   |
| $B_4^4$    | $4.87 \times 10^{-6}$                    | <b>-2.18</b>                             | $-3.61 \times 10^{-6}$                   | $5.35 \times 10^{-6}$                    | $-4.00 \times 10^{-6}$                  |
| $B_6^{-6}$ | $-1.02 \times 10^{-3}$                   | $-1.46 \times 10^{-7}$                   | $-1.08 \times 10^{-7}$                   | $2.65 \times 10^{-2}$                    | $3.75 \times 10^{-8}$                   |
| $B_6^{-5}$ | $1.06 \times 10^{-9}$                    | $5.18 \times 10^{-10}$                   | $-7.29 \times 10^{-10}$                  | $-3.23 \times 10^{-10}$                  | $-3.65 \times 10^{-8}$                  |
| $B_6^{-4}$ | $-1.44 \times 10^{-8}$                   | $5.12 \times 10^{-3}$                    | $-1.06 \times 10^{-8}$                   | $1.15 \times 10^{-8}$                    | $-1.24 \times 10^{-8}$                  |
| $B_6^{-3}$ | $-7.24 \times 10^{-10}$                  | $1.79 \times 10^{-11}$                   | $1.24 \times 10^{-10}$                   | $-3.79 \times 10^{-10}$                  | $-1.63 \times 10^{-10}$                 |
| $B_6^{-2}$ | $1.12 \times 10^{-9}$                    | $-1.43 \times 10^{-8}$                   | $5.25 \times 10^{-9}$                    | $-6.32 \times 10^{-9}$                   | $4.73 \times 10^{-9}$                   |
| $B_6^{-1}$ | $2.07 \times 10^{-10}$                   | $-2.96 \times 10^{-11}$                  | $2.74 \times 10^{-11}$                   | $-1.14 \times 10^{-10}$                  | $-2.24 \times 10^{-9}$                  |
| $B_6^0$    | <b><math>-2.23 \times 10^{-3}</math></b> | <b><math>-3.60 \times 10^{-3}</math></b> | <b><math>-3.58 \times 10^{-3}</math></b> | <b><math>-3.68 \times 10^{-3}</math></b> | <b><math>6.88 \times 10^{-3}</math></b> |
| $B_6^1$    | $-8.28 \times 10^{-11}$                  | $-6.85 \times 10^{-11}$                  | $9.83 \times 10^{-12}$                   | $-9.51 \times 10^{-11}$                  | $2.39 \times 10^{-9}$                   |
| $B_6^2$    | $-5.26 \times 10^{-8}$                   | $7.20 \times 10^{-8}$                    | $-1.14 \times 10^{-7}$                   | $-2.21 \times 10^{-7}$                   | $-2.01 \times 10^{-8}$                  |
| $B_6^3$    | $1.23 \times 10^{-10}$                   | $-1.62 \times 10^{-10}$                  | $2.79 \times 10^{-11}$                   | $6.68 \times 10^{-10}$                   | $-3.92 \times 10^{-9}$                  |
| $B_6^4$    | $1.88 \times 10^{-7}$                    | <b><math>-4.23 \times 10^{-2}</math></b> | $1.20 \times 10^{-7}$                    | $1.34 \times 10^{-7}$                    | $2.07 \times 10^{-7}$                   |
| $B_6^5$    | $2.57 \times 10^{-10}$                   | $-5.29 \times 10^{-10}$                  | $3.82 \times 10^{-11}$                   | $-2.03 \times 10^{-9}$                   | $-2.60 \times 10^{-8}$                  |
| $B_6^6$    | <b><math>3.44 \times 10^{-2}</math></b>  | $6.70 \times 10^{-7}$                    | $7.08 \times 10^{-7}$                    | <b><math>2.52 \times 10^{-1}</math></b>  | $-4.73 \times 10^{-7}$                  |

Table S49. Crystal field parameters from CASSCF calculations on the  $\text{ErF}_x$  series with bold parameters indicating truncated point group terms.

| <i>CFP</i> | <i>ErF<sub>3</sub></i>                   | <i>ErF<sub>4</sub></i>                   | <i>ErF<sub>5</sub></i>                   | <i>ErF<sub>6</sub></i>                   |
|------------|------------------------------------------|------------------------------------------|------------------------------------------|------------------------------------------|
| $B_2^{-2}$ | $-1.87 \times 10^{-7}$                   | $-3.20 \times 10^{-7}$                   | $2.38 \times 10^{-6}$                    | $-3.24 \times 10^{-6}$                   |
| $B_2^{-1}$ | $-8.50 \times 10^{-9}$                   | $-1.43 \times 10^{-9}$                   | $-1.14 \times 10^{-9}$                   | $2.70 \times 10^{-8}$                    |
| $B_2^0$    | <b>-3.92</b>                             | <b>-5.43</b>                             | <b>-6.29</b>                             | <b>-7.58</b>                             |
| $B_2^1$    | $-1.00 \times 10^{-8}$                   | $8.77 \times 10^{-9}$                    | $1.29 \times 10^{-8}$                    | $2.21 \times 10^{-8}$                    |
| $B_2^2$    | $-8.27 \times 10^{-9}$                   | $-3.40 \times 10^{-6}$                   | $-3.11 \times 10^{-6}$                   | $3.00 \times 10^{-6}$                    |
| $B_4^{-4}$ | $-5.17 \times 10^{-8}$                   | $-4.41 \times 10^{-2}$                   | $9.27 \times 10^{-8}$                    | $-1.83 \times 10^{-8}$                   |
| $B_4^{-3}$ | $-8.50 \times 10^{-11}$                  | $6.47 \times 10^{-11}$                   | $1.61 \times 10^{-11}$                   | $1.85 \times 10^{-10}$                   |
| $B_4^{-2}$ | $3.26 \times 10^{-9}$                    | $-3.02 \times 10^{-8}$                   | $-2.40 \times 10^{-8}$                   | $-2.78 \times 10^{-8}$                   |
| $B_4^{-1}$ | $-4.35 \times 10^{-11}$                  | $1.10 \times 10^{-10}$                   | $-7.29 \times 10^{-11}$                  | $-2.24 \times 10^{-10}$                  |
| $B_4^0$    | <b><math>3.21 \times 10^{-3}</math></b>  | <b><math>4.64 \times 10^{-3}</math></b>  | <b><math>4.45 \times 10^{-3}</math></b>  | <b><math>5.77 \times 10^{-3}</math></b>  |
| $B_4^1$    | $-1.07 \times 10^{-10}$                  | $-4.84 \times 10^{-12}$                  | $-1.00 \times 10^{-10}$                  | $-1.87 \times 10^{-10}$                  |
| $B_4^2$    | $5.11 \times 10^{-8}$                    | $2.15 \times 10^{-8}$                    | $2.65 \times 10^{-8}$                    | $-6.10 \times 10^{-8}$                   |
| $B_4^3$    | $1.30 \times 10^{-10}$                   | $7.27 \times 10^{-11}$                   | $7.53 \times 10^{-12}$                   | $3.42 \times 10^{-10}$                   |
| $B_4^4$    | $-1.97 \times 10^{-7}$                   | <b><math>6.11 \times 10^{-2}</math></b>  | $-2.26 \times 10^{-8}$                   | $-6.72 \times 10^{-9}$                   |
| $B_6^{-6}$ | $1.72 \times 10^{-4}$                    | $4.40 \times 10^{-9}$                    | $-3.53 \times 10^{-9}$                   | $8.47 \times 10^{-4}$                    |
| $B_6^{-5}$ | $-7.42 \times 10^{-12}$                  | $-2.83 \times 10^{-12}$                  | $1.38 \times 10^{-11}$                   | $-1.24 \times 10^{-11}$                  |
| $B_6^{-4}$ | $-5.72 \times 10^{-11}$                  | $4.33 \times 10^{-4}$                    | $1.01 \times 10^{-9}$                    | $4.15 \times 10^{-9}$                    |
| $B_6^{-3}$ | $1.05 \times 10^{-12}$                   | $7.99 \times 10^{-14}$                   | $-2.29 \times 10^{-12}$                  | $3.70 \times 10^{-13}$                   |
| $B_6^{-2}$ | $2.04 \times 10^{-10}$                   | $-5.37 \times 10^{-10}$                  | $-5.19 \times 10^{-10}$                  | $7.63 \times 10^{-11}$                   |
| $B_6^{-1}$ | $6.07 \times 10^{-13}$                   | $-9.69 \times 10^{-13}$                  | $1.43 \times 10^{-12}$                   | $1.28 \times 10^{-12}$                   |
| $B_6^0$    | <b><math>-3.47 \times 10^{-5}</math></b> | <b><math>-5.89 \times 10^{-5}</math></b> | <b><math>-6.34 \times 10^{-5}</math></b> | <b><math>-7.08 \times 10^{-5}</math></b> |
| $B_6^1$    | $3.01 \times 10^{-12}$                   | $-7.94 \times 10^{-13}$                  | $9.89 \times 10^{-14}$                   | $1.53 \times 10^{-12}$                   |
| $B_6^2$    | $9.54 \times 10^{-10}$                   | $1.73 \times 10^{-9}$                    | $5.40 \times 10^{-10}$                   | $3.25 \times 10^{-10}$                   |
| $B_6^3$    | $2.57 \times 10^{-12}$                   | $-2.38 \times 10^{-12}$                  | $-3.10 \times 10^{-13}$                  | $-3.71 \times 10^{-12}$                  |
| $B_6^4$    | $-4.36 \times 10^{-10}$                  | <b><math>-6.00 \times 10^{-4}</math></b> | $-3.09 \times 10^{-10}$                  | $1.49 \times 10^{-9}$                    |
| $B_6^5$    | $2.90 \times 10^{-12}$                   | $2.11 \times 10^{-13}$                   | $-7.15 \times 10^{-12}$                  | $1.59 \times 10^{-11}$                   |
| $B_6^6$    | <b><math>4.03 \times 10^{-4}</math></b>  | $-3.04 \times 10^{-10}$                  | $-1.61 \times 10^{-9}$                   | <b><math>3.20 \times 10^{-3}</math></b>  |

Table S50. The anisotropy and  $\tau_{QTM}$  attained from the calculations conducted by PHI for Yb(III) in ideal symmetries.

| PHI<br>Analysis  | <i>g</i> -tensor values |        |       | QTM from PHI          | QTM from CASSCF       |
|------------------|-------------------------|--------|-------|-----------------------|-----------------------|
|                  | $g_x$                   | $g_y$  | $g_z$ | (s)                   | (s)                   |
| YbF <sub>3</sub> | 0.197                   | 0.197  | 7.99  | $7.34 \times 10^{-7}$ | $1.3 \times 10^{-6}$  |
| YbF <sub>4</sub> | 0.0311                  | 0.0311 | 7.94  | $2.92 \times 10^{-5}$ | $3.33 \times 10^{-5}$ |
| YbF <sub>5</sub> | 0                       | 0      | 8.0   | $\infty$              | 3490                  |
| YbF <sub>6</sub> | 0.730                   | 0.730  | 7.80  | $5.27 \times 10^{-8}$ | $4.14 \times 10^{-8}$ |
| YbF <sub>8</sub> | 0                       | 0      | 8.0   | $\infty$              | 198.81                |

Table S51. The anisotropy and  $\tau_{QTM}$  attained from the calculations conducted by PHI for Er(III) in ideal symmetries.

| PHI<br>Analysis  | <i>g</i> -tensor values |                        |        | QTM from PHI          | QTM from CASSCF       |
|------------------|-------------------------|------------------------|--------|-----------------------|-----------------------|
|                  | $g_x$                   | $g_y$                  | $g_z$  | (s)                   | (s)                   |
| ErF <sub>3</sub> | $9.09 \times 10^{-17}$  | $9.47 \times 10^{-17}$ | 17.996 | $7.47 \times 10^{24}$ | $9.61 \times 10^7$    |
| ErF <sub>4</sub> | $4.26 \times 10^{-3}$   | $4.26 \times 10^{-3}$  | 17.94  | $3.53 \times 10^{-3}$ | $7.96 \times 10^{-4}$ |
| ErF <sub>5</sub> | 0                       | 0                      | 18.0   | $\infty$              | $3.45 \times 10^{10}$ |
| ErF <sub>6</sub> | $4.92 \times 10^{-17}$  | $7.16 \times 10^{-17}$ | 17.89  | $1.70 \times 10^{25}$ | $1.38 \times 10^5$    |

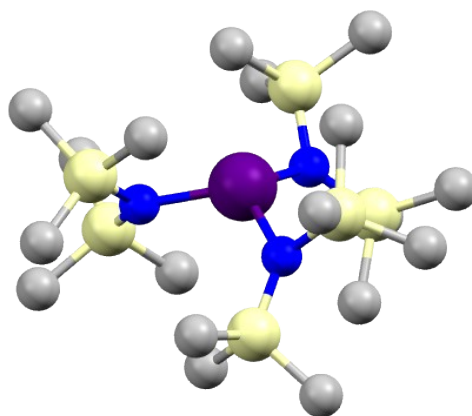

### 5. Comparison of a Real Trigonal Er(III) SMM and its Yb(III) Analogue

**Figure S7.** Distorted  $D_{3h}$  structure of  $[\text{Ln}\{\text{N}(\text{Me}_3\text{Si})_2\}_3]$

**Table S52.** The anisotropy, GS wavefunction decomposition,  $U_{\text{eff}}$ , and  $\tau_{QTM}$  for  $[\text{Er}\{\text{N}(\text{Me}_3\text{Si})_2\}_3]$

| Crystal field               |            | $g$ -tensor values    |                       |       | Angle        | Wavefunction                                                                                                                                          |
|-----------------------------|------------|-----------------------|-----------------------|-------|--------------|-------------------------------------------------------------------------------------------------------------------------------------------------------|
| Energy ( $\text{cm}^{-1}$ ) | Energy (K) | $g_x$                 | $g_y$                 | $g_z$ | ( $^\circ$ ) | decomposition                                                                                                                                         |
| 0                           | 0          | $2.05 \times 10^{-5}$ | $2.17 \times 10^{-5}$ | 17.88 | --           | 99.6% $ \bar{1}5/2\rangle$ ;<br>0.4% $ \bar{1}9/2\rangle$ ;                                                                                           |
| 110                         | 157        | 0.140                 | 0.140                 | 15.46 | 0            | 99.7% $ \pm 13/2\rangle$ ;<br>0.2% $ \pm 7/2\rangle$ ;<br>0.1% $ \pm 1/2\rangle$ ;                                                                    |
| 197                         | 281        | 0.138                 | 0.139                 | 12.79 | 0            | 96.1% $ \pm 11/2\rangle$ ;<br>3.3% $ \pm 5/2\rangle$ ;<br>0.6% $ \bar{1}1/2\rangle$ ;                                                                 |
| 273                         | 390        | 0.024                 | 0.025                 | 9.905 | 0            | 89.7% $ \pm 9/2\rangle$ ;<br>10.0% $ \pm 3/2\rangle$ ;<br>0.4% $ \pm 15/2\rangle$ ;                                                                   |
| 339                         | 484        | 5.91                  | 5.90                  | 5.86  | 27           | 76.8% $ \bar{1}7/2\rangle$ ;<br>12.4% $ \bar{1}1/2\rangle$ ;<br>10.3% $ \pm 5/2\rangle$ ;<br>0.3% $ \pm 11/2\rangle$ ;<br>0.1% $ \bar{1}3/2\rangle$ ; |
| 450                         | 643        | 5.88                  | 5.81                  | 3.69  | 90           | 74.2% $ \pm 5/2\rangle$ ;<br>11.9% $ \bar{1}7/2\rangle$ ;<br>10.7% $ \bar{1}1/2\rangle$ ;<br>3.1% $ \pm 11/2\rangle$ ;<br>0.1% $ \bar{1}3/2\rangle$ ; |
| 515                         | 736        | 0.114                 | 0.205                 | 3.98  | 2            | 90.0% $ \pm 3/2\rangle$ ;<br>9.9% $ \pm 9/2\rangle$ ;                                                                                                 |
| 556                         | 794        | 9.54                  | 9.18                  | 1.06  | 90           | 76.2% $ \bar{1}1/2\rangle$ ;<br>12.1% $ \pm 5/2\rangle$ ;<br>11.1% $ \bar{1}7/2\rangle$ ;                                                             |

|  |  |  |  |  |  |                                                        |
|--|--|--|--|--|--|--------------------------------------------------------|
|  |  |  |  |  |  | 0.5% $ \pm 11/2\rangle$ ;<br>0.1% $ \mp 13/2\rangle$ ; |
|--|--|--|--|--|--|--------------------------------------------------------|

Table S53. The anisotropy, GS wavefunction decomposition,  $U_{\text{eff}}$ , and  $\tau_{QTM}$  for  $[\text{Yb}\{\text{N}(\text{Me}_3\text{Si})_2\}_3]$

| Crystal field               |            | $g$ -tensor values |        |        | Angle        | Wavefunction                                                                      |
|-----------------------------|------------|--------------------|--------|--------|--------------|-----------------------------------------------------------------------------------|
| Energy ( $\text{cm}^{-1}$ ) | Energy (K) | $g_x$              | $g_y$  | $g_z$  | ( $^\circ$ ) | decomposition                                                                     |
| 0                           | 0          | 0.175              | 0.175  | 7.94   | --           | 99.6% $ \pm 7/2\rangle$ ;<br>0.3% $ \pm 1/2\rangle$ ;<br>0.1% $ \mp 5/2\rangle$ ; |
| 777                         | 1110       | 0.167              | 0.168  | 5.63   | 0            | 99.7% $ \pm 5/2\rangle$ ;<br>0.3% $ \mp 1/2\rangle$ ;<br>0.1% $ \mp 7/2\rangle$ ; |
| 1221                        | 1745       | 0.0323             | 0.0332 | 3.3882 | 0            | 100.0% $ \mp 3/2\rangle$ ;                                                        |
| 1444                        | 2063       | 4.58               | 4.51   | 1.131  | 90           | 99.4% $ \pm 1/2\rangle$ ;<br>0.3% $ \mp 5/2\rangle$ ;<br>0.3% $ \pm 7/2\rangle$ ; |

## 6. Predictions of Experimental Targets

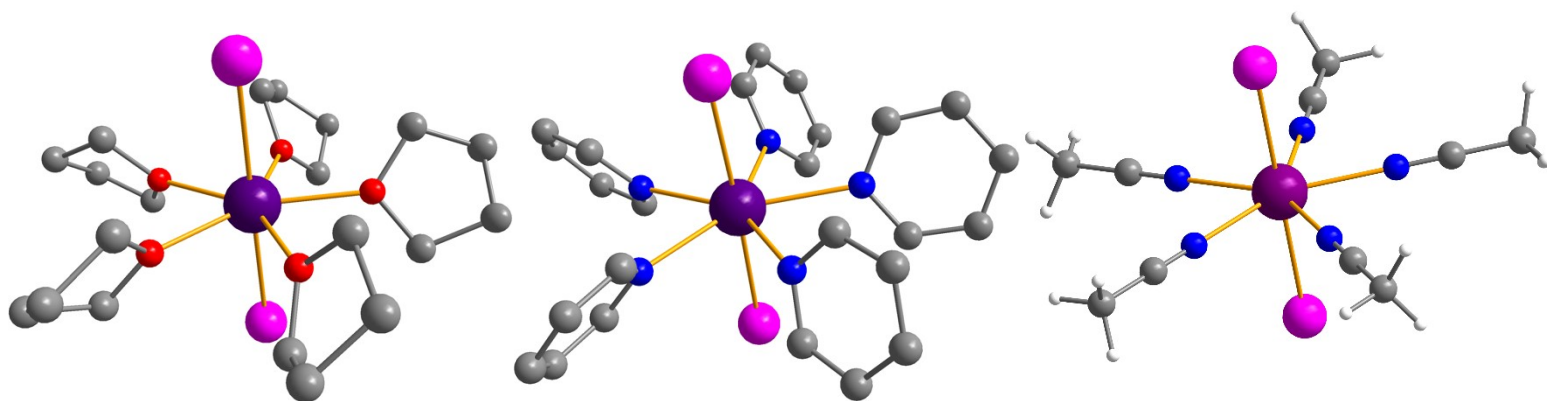

Figure S8. Known 7-coordinated Yb(III) environments with the chemical formulae of  $[\text{YbI}_2(\text{X})_5]^+$ .

Table S54. The anisotropy, GS wavefunction decomposition,  $U_{\text{eff}}$ , and  $\tau_{QTM}$  for  $[\text{YbI}_2(\text{X})_5]^+$  complexes.

|                                           | $g$ -tensor values    |                       |       | Wavefunction<br>Decomposition                       | $U_{\text{eff}}$ | QTM                   |
|-------------------------------------------|-----------------------|-----------------------|-------|-----------------------------------------------------|------------------|-----------------------|
|                                           | $g_x$                 | $g_y$                 | $g_z$ |                                                     | (K)              | (s)                   |
| $1\text{-}[\text{YbI}_2(\text{THF})_5]^+$ | $5.20 \times 10^{-3}$ | $7.80 \times 10^{-3}$ | 7.97  | 99.9% $ \pm 7/2\rangle$ ;<br>0.1% $ \mp 3/2\rangle$ | 693              | $6.48 \times 10^{-4}$ |

|                                                         |                       |                       |      |                                            |     |                       |
|---------------------------------------------------------|-----------------------|-----------------------|------|--------------------------------------------|-----|-----------------------|
| <b>2-[YbI<sub>2</sub>(THF)<sub>5</sub>]<sup>+</sup></b> | $1.51 \times 10^{-2}$ | $1.81 \times 10^{-2}$ | 7.97 | 99.9%   $\pm 7/2$ );<br>0.1%   $\mp 3/2$ ) | 714 | $1.02 \times 10^{-4}$ |
| <b>[YbI<sub>2</sub>(Py)<sub>5</sub>]<sup>+</sup></b>    | $3.30 \times 10^{-2}$ | $3.72 \times 10^{-2}$ | 7.98 | 99.9%   $\pm 7/2$ )                        | 675 | $2.30 \times 10^{-5}$ |
| <b>[YbI<sub>2</sub>(MeCN)<sub>5</sub>]<sup>+</sup></b>  | $1.56 \times 10^{-5}$ | $1.56 \times 10^{-5}$ | 7.98 | 100%   $\pm 7/2$ )                         | 95  | 118                   |

Table S55. Crystal field properties resulted from CASSCF-SO calculations for a 7-coordinated known structure of **1-[YbI<sub>2</sub>(THF)<sub>5</sub>]<sup>+</sup>**.

| Crystal field              |            | g-tensor values         |                         |                | Angle | Wavefunction decomposition                                                                                |
|----------------------------|------------|-------------------------|-------------------------|----------------|-------|-----------------------------------------------------------------------------------------------------------|
| Energy (cm <sup>-1</sup> ) | Energy (K) | g <sub>x</sub>          | g <sub>y</sub>          | g <sub>z</sub> | (°)   |                                                                                                           |
| 0                          | 0          | 5.20 × 10 <sup>-3</sup> | 7.80 × 10 <sup>-3</sup> | 7.97           | --    | 99.9%   ± 7/2);<br>0.1%   ∓ 3/2)                                                                          |
| 438                        | 631        | 0.251                   | 0.253                   | 5.60           | 10    | 95.8%   ± 5/2);<br>3.1%   ± 1/2); 1%   ± 3/2)                                                             |
| 482                        | 693        | 1.75                    | 3.23                    | 4.82           | 83    | 63.1%   ± 3/2);<br>31.8%   ∓ 1/2);<br>2.1%   ± 1/2);<br>1.4%   ± 5/2);<br>1.1%   ∓ 5/2);<br>0.3%   ∓ 3/2) |
| 505                        | 727        | 0.515                   | 0.937                   | 7.55           | 90    | 50%   ∓ 1/2);<br>33.1%   ± 3/2);<br>12.9%   ± 1/2);<br>2.3%   ∓ 3/2);<br>1.6%   ∓ 5/2)                    |

Table S56. Crystal field properties resulted from CASSCF-SO calculations for the second 7-coordinated known structure of **2-[YbI<sub>2</sub>(THF)<sub>5</sub>]<sup>+</sup>**.

| Crystal field              |            | g-tensor values         |                         |                | Angle | Wavefunction decomposition                                                                                 |
|----------------------------|------------|-------------------------|-------------------------|----------------|-------|------------------------------------------------------------------------------------------------------------|
| Energy (cm <sup>-1</sup> ) | Energy (K) | g <sub>x</sub>          | g <sub>y</sub>          | g <sub>z</sub> | (°)   |                                                                                                            |
| 0                          | 0          | 1.51 × 10 <sup>-2</sup> | 1.81 × 10 <sup>-2</sup> | 7.97           | --    | 99.9%   ± 7/2);<br>0.1%   ∓ 3/2)                                                                           |
| 446                        | 642        | 0.202                   | 0.342                   | 5.72           | 12    | 96.6%   ± 5/2);<br>2.7%   ± 3/2);<br>0.6%   ± 1/2);<br>0.1%   ∓ 3/2)                                       |
| 496                        | 714        | 1.98                    | 3.65                    | 3.77           | 66    | 63.7%   ± 3/2);<br>24.5%   ± 1/2);<br>10.1%   ∓ 1/2);<br>1.0%   ± 5/2);<br>0.4%   ∓ 5/2);<br>0.3%   ∓ 3/2) |
| 521                        | 750        | 0.344                   | 0.584                   | 7.17           | 77    | 54.4%   ± 1/2);<br>31.2%   ± 3/2);<br>10.3%   ∓ 1/2);<br>2.0%   ∓ 3/2);<br>2.0%   ± 5/2)                   |

Table S57. Crystal field properties resulted from CASSCF-SO calculations for a 7-coordinated known structure of  $[\text{YbI}_2(\text{Py})_5]^+$ .

| Crystal field              |            | g-tensor values       |                       |                | Angle | Wavefunction decomposition                                                                                                        |
|----------------------------|------------|-----------------------|-----------------------|----------------|-------|-----------------------------------------------------------------------------------------------------------------------------------|
| Energy (cm <sup>-1</sup> ) | Energy (K) | g <sub>x</sub>        | g <sub>y</sub>        | g <sub>z</sub> | (°)   |                                                                                                                                   |
| 0                          | 0          | $3.30 \times 10^{-2}$ | $3.72 \times 10^{-2}$ | 7.98           | --    | 99.9%  $\pm 7/2$ );                                                                                                               |
| 426                        | 613        | 0.575                 | 0.784                 | 5.58           | 12    | 95.1%  $\pm 5/2$ );<br>3.1%  $\pm 1/2$ );<br>1.3%  $\pm 3/2$ );<br>0.5%  $\mp 3/2$ )                                              |
| 484                        | 697        | 2.41                  | 2.91                  | 3.43           | 86    | 80.2%  $\pm 3/2$ );<br>14.8%  $\mp 1/2$ );<br>1.7%  $\pm 5/2$ );<br>1.7%  $\mp 5/2$ );<br>1.4%  $\pm 1/2$ );<br>0.2%  $\mp 3/2$ ) |
| 526                        | 756        | 0.528                 | 1.06                  | 7.33           | 89    | 74.9%  $\pm 1/2$ );<br>12.8%  $\mp 3/2$ );<br>5.7%  $\mp 1/2$ );<br>4.9%  $\pm 3/2$ );<br>1.3%  $\pm 5/2$ );<br>0.4%  $\mp 5/2$ ) |

Table S58. Crystal field properties resulted from CASSCF-SO calculations for an idealised 7-coordinated known structure of  $[\text{YbI}_2(\text{MeCN})_5]^+$  with a fixed Yb-N bond distance 2.395 Å.

| Crystal field              |            | g-tensor values       |                       |                | Angle | Wavefunction decomposition |
|----------------------------|------------|-----------------------|-----------------------|----------------|-------|----------------------------|
| Energy (cm <sup>-1</sup> ) | Energy (K) | g <sub>x</sub>        | g <sub>y</sub>        | g <sub>z</sub> | (°)   |                            |
| 0                          | 0          | $1.56 \times 10^{-5}$ | $1.56 \times 10^{-5}$ | 7.98           | --    | 100%  $\pm 7/2$ );         |
| 66                         | 95         | 4.56                  | 4.56                  | 1.14           | 0     | 100%  $\pm 1/2$ );         |
| 104                        | 150        | $3.02 \times 10^{-4}$ | $3.73 \times 10^{-4}$ | 3.44           | 0     | 100%  $\pm 3/2$ );         |
| 180                        | 259        | $1.89 \times 10^{-5}$ | $5.24 \times 10^{-5}$ | 5.70           | 0     | 100%  $\pm 5/2$ );         |

Table S59. Crystal field properties resulted from CASSCF-SO calculations for an idealised 7-coordinated known structure of  $[\text{YbI}_2(\text{MeCN})_5]^+_{\text{short}}$  with Yb-N bond distance 2.221 Å.

| Crystal field              |            | g-tensor values         |                         |                | Angle | Wavefunction  |
|----------------------------|------------|-------------------------|-------------------------|----------------|-------|---------------|
| Energy (cm <sup>-1</sup> ) | Energy (K) | g <sub>x</sub>          | g <sub>y</sub>          | g <sub>z</sub> | (°)   | decomposition |
| 0                          | 0          | 1.34 × 10 <sup>-5</sup> | 1.34 × 10 <sup>-5</sup> | 7.96           | --    | 100%   ± 7/2⟩ |
| 386                        | 556        | 1.86 × 10 <sup>-5</sup> | 3.92 × 10 <sup>-4</sup> | 3.44           | 0     | 100%   ± 3/2⟩ |
| 413                        | 594        | 1.73 × 10 <sup>-4</sup> | 2.00 × 10 <sup>-4</sup> | 5.68           | 0     | 100%   ± 5/2⟩ |
| 421                        | 606        | 4.55                    | 4.55                    | 1.13           | 0     | 100%   ± 1/2⟩ |

Table S60. Crystal field properties resulted from CASSCF-SO calculations for an empirically optimised 7-coordinated structure of  $[\text{YbI}_2(\text{MeCN})_5]^+_{\text{opt}}$ .

| Crystal field              |            | g-tensor values |                |                | Angle | Wavefunction                                         |
|----------------------------|------------|-----------------|----------------|----------------|-------|------------------------------------------------------|
| Energy (cm <sup>-1</sup> ) | Energy (K) | g <sub>x</sub>  | g <sub>y</sub> | g <sub>z</sub> | (°)   | decomposition                                        |
| 0                          | 0          | 0.151           | 0.389          | 7.60           | --    | 96.2%   ± 7/2⟩;<br>2.96%   ∓ 3/2⟩                    |
| 314                        | 452        | 1.51            | 3.28           | 5.40           | 0     | 41.0%   ± 5/2⟩;<br>35.4%   ∓ 3/2⟩;<br>23.2%   ± 1/2⟩ |
| 333                        | 479        | 1.90            | 2.07           | 3.16           | 0     | 47.6%   ± 1/2⟩;<br>46.3%   ± 5/2⟩;<br>6.03%   ∓ 3/2⟩ |
| 385                        | 554        | 1.49            | 2.39           | 5.77           | 0     | 55.6%   ± 3/2⟩;<br>28.7%   ∓ 1/2⟩;<br>12.4%   ∓ 5/2⟩ |

## References:

- 1 J. J. Zakrzewski, K. Kumar, M. Zychowicz, R. Jankowski, M. Wyczesany, B. Sieklucka, S. I. Ohkoshi and S. Chorazy, *Journal of Physical Chemistry Letters*, 2021, **12**, 10558–10566.
- 2 H. Allia, A. Rodríguez-Expósito, M. A. Palacios, J. R. Jiménez, A. N. Carneiro Neto, R. T. Moura, F. Piccinelli, A. Navarro, M. M. Quesada-Moreno and E. Colacio, *Physical Chemistry Chemical Physics*, 2025, **27**, 13266–13279.
- 3 M. Wang, X. Wei, J. Zhu, J. Wang, M. Wang, L. Liu, T. Sun and Y. Tang, *J. Solid State Chem.*, 2020, **283**, 121172.
- 4 W. Huang, J. Xu, D. Wu, X. Huang and J. Jiang, *New Journal of Chemistry*, 2015, **39**, 8650–8657.
- 5 S. Chorazy, M. Zychowicz, S. I. Ohkoshi and B. Sieklucka, *Inorg. Chem.*, 2019, **58**, 165–179.
- 6 D. Q. Wu, D. Shao, X. Q. Wei, F. X. Shen, L. Shi, Y. Q. Zhang and X. Y. Wang, *Dalton Transactions*, 2017, **46**, 12884–12892.
- 7 Y. Li, J. W. Yu, Z. Y. Liu, E. C. Yang and X. J. Zhao, *Inorg. Chem.*, 2015, **54**, 153–160.
- 8 J. R. Jiménez, I. F. Díaz-Ortega, E. Ruiz, D. Aravena, S. J. A. Pope, E. Colacio and J. M. Herrera, *Chemistry - A European Journal*, 2016, **22**, 14548–14559.
- 9 A. Górczyński, D. Marcinkowski, M. Kubicki, M. Löffler, M. Korabik, M. Karbowski, P. Wiśniewski, C. Rudowicz and V. Patroniak, *Inorg. Chem. Front.*, 2018, **5**, 605–618.
- 10 D. Zeng, M. Ren, S. S. Bao, Z. S. Cai, C. Xu and L. M. Zheng, *Inorg. Chem.*, 2016, **55**, 5297–5304.
- 11 B. Lefeuvre, J. Flores Gonzalez, F. Gendron, V. Dorcet, F. Riobé, V. Cherkasov, O. Maury, B. Le Guennic, O. Cador, V. Kuropatov and F. Pointillart, *Molecules*, 2020, **25**, 492.
- 12 Y. Xin, K. Kumar, J. J. Zakrzewski, S. Chorazy, K. Nakabayashi, O. Stefanczyk and S. I. Ohkoshi, *Journal of Physical Chemistry C*, 2023, **127**, 15500–15511.
- 13 A. Borah, S. Dey, S. K. Gupta, M. G. Walawalkar, G. Rajaraman and R. Murugavel, *Chemical Communications*, 2020, **56**, 11879–11882.
- 14 S. D. Zhu, J. J. Hu, L. Dong, H. R. Wen, S. J. Liu, Y. B. Lu and C. M. Liu, *J. Mater. Chem. C Mater.*, 2020, **8**, 16032–16041.
- 15 T. P. Latendresse, V. Vieru, A. Upadhyay, N. S. Bhuvanesh, L. F. Chibotaru and M. Nippe, *Chem. Sci.*, 2020, **11**, 3936–3951.
- 16 M. Ren, Z. L. Xu, S. S. Bao, T. T. Wang, Z. H. Zheng, R. A. S. Ferreira, L. M. Zheng and L. D. Carlos, *Dalton Transactions*, 2016, **45**, 2974–2982.
- 17 B. Casanovas, M. Font-Bardía, S. Speed, M. S. El Fallah and R. Vicente, *Eur. J. Inorg. Chem.*, 2018, **2018**, 1928–1937.
- 18 J. L. Liu, K. Yuan, J. D. Leng, L. Ungur, W. Wernsdorfer, F. S. Guo, L. F. Chibotaru and M. L. Tong, *Inorg. Chem.*, 2012, **51**, 8538–8544.
- 19 K. Soussi, J. Jung, F. Pointillart, B. Le Guennic, B. Lefeuvre, S. Golhen, O. Cador, Y. Guyot, O. Maury and L. Ouahab, *Inorg. Chem. Front.*, 2015, **2**, 1105–1117.
- 20 L. Maxwell, M. Amoza and E. Ruiz, *Inorg. Chem.*, 2018, **57**, 13225–13234.
- 21 F. Guégan, J. Jung, B. Le Guennic, F. Riobé, O. Maury, B. Gillon, J. F. Jacquot, Y. Guyot, C. Morell and D. Luneau, *Inorg. Chem. Front.*, 2019, **6**, 3152–3157.
- 22 M. Sugita, N. Ishikawa, T. Ishikawa, S. Y. Koshihara and Y. Kaizu, *Inorg. Chem.*, 2006, **45**, 1299–1304.

- 23 C. A. Mattei, V. Montigaud, B. Lefevre, V. Dorcet, G. Argouarch, O. Cador, B. Le Guennic, O. Maury, C. Lalli, Y. Guyot, S. Guy, C. Gindre, A. Bensalah-Ledoux, F. Riobé, B. Baguenard and F. Pointillart, *J. Mater. Chem. C Mater.*, 2023, **11**, 7299–7310.
- 24 N. Jain, F. Houard, R. Marchal, M. Cordier, B. Le Guennic, Y. Suffren, Y. Sarazin and K. Bernot, *ChemistryEurope*, 2024, **2**, e202400062.
- 25 D. Errulat, K. L. M. Harriman, D. A. Gálico, A. A. Kitos, A. Mansikkamäki and M. Murugesu, *Nat. Chem.*, 2023, **15**, 1100–1107.
- 26 M. Liberka, K. Boidachenko, J. J. Zakrzewski, M. Zychowicz, J. Wang, S. Ohkoshi and S. Chorazy, *Magnetochemistry*, 2021, **7**, 79.
- 27 J. González, V. K. Fagundes, M. A. Hay, E. Dallerba, M. Massi, C. R. Hall, M. J. Giansiracusa and C. Boskovic, *Dalton Transactions*, 2026, **55**, 1792
- 28 P. Richardson, R. Marin, Y. Zhang, B. Gabidullin, J. Ovens, J. O. Moilanen and M. Murugesu, *Chemistry - A European Journal*, 2021, **27**, 2361–2370.
- 29 K. Karachousos-Spiliotakopoulos, V. Tangoulis, N. Panagiotou, A. Tasiopoulos, E. Moreno-Pineda, W. Wernsdorfer, M. Schulze, A. M. P. Botas and L. D. Carlos, *Dalton Transactions*, 2022, **51**, 8208–8216.
- 30 S. Bagio, J. González, R. W. Gable, C. R. Hall, C. Boskovic and M. J. Giansiracusa, *Dalton Transactions*, 2025, **54**, 5061–5074.
- 31 K. Kumar, O. Stefanczyk, K. Nakabayashi, K. Imoto, Y. Oki and S. Ohkoshi, *Adv. Opt. Mater.*, 2022, **10**, 202101721
